# Supplementary material for: Photophysical properties of three-coordinate heteroleptic Cu(i) β-diketiminate triarylphosphine complexes
Source: Royal Society of Chemistry journal article supplement (doi:10.1039/d4dt02681k), 2024-11-18
Supplement: d4dt02681k1.pdf [file d4dt02681k1.pdf]

Electronic Supplementary Information for

**Photophysical properties of three-coordinate heteroleptic Cu(I)  $\beta$ -diketiminato triarylphosphine complexes**

Ashish Kumar, Dooyoung Kim, Giao Nguyen, Chenggang Jiang, Soumi Chakraborty, Thomas S. Teets

*Department of Chemistry, University of Houston*

*3585 Cullen Blvd, Room 112, Houston, Texas- 77204-5003, USA*

*email: [tteets@uh.edu](mailto:tteets@uh.edu)*

| Index                                          | Page    |
|------------------------------------------------|---------|
| Summary of X-ray crystallography data          | S2–S6   |
| NMR spectra of complexes <b>Cu1–Cu9</b>        | S7–S16  |
| UV–vis and PL data of complexes <b>Cu1–Cu5</b> | S17–S19 |
| Cyclic voltammetry of complexes <b>Cu1–Cu5</b> | S20–S22 |
| Results from DFT calculations on <b>Cu6</b>    | S23–S27 |

**Table S1.** Crystallographic summary for **Cu1** and **Cu2**.

|                                                                             | Cu(PhNacNac <sup>Me</sup> )(PPh <sub>3</sub> ) ( <b>Cu1</b> )                       | Cu(PhNacNac <sup>Me</sup> )(PPh <sub>3</sub> <sup>F3</sup> ) ( <b>Cu2</b> )         |
|-----------------------------------------------------------------------------|-------------------------------------------------------------------------------------|-------------------------------------------------------------------------------------|
| CCDC                                                                        | 2382410                                                                             | 2382411                                                                             |
| <b>Crystal data</b>                                                         |                                                                                     |                                                                                     |
| Chemical formula                                                            | C <sub>35</sub> H <sub>32</sub> CuN <sub>2</sub> P                                  | C <sub>35</sub> H <sub>29</sub> CuF <sub>3</sub> N <sub>2</sub> P                   |
| $M_r$                                                                       | 575.13                                                                              | 629.11                                                                              |
| Crystal system, space group                                                 | Triclinic, $P\bar{1}$                                                               | Orthorhombic, $Pbca$                                                                |
| Temperature (K)                                                             | 123                                                                                 | 123                                                                                 |
| $a, b, c$ (Å)                                                               | 8.7263 (9), 12.4897 (12), 13.9463 (14)                                              | 16.709 (4), 17.529 (4), 20.332 (5)                                                  |
| $\alpha, \beta, \gamma$ (°)                                                 | 98.878 (1), 107.371 (1), 92.195 (1)                                                 | 90, 90, 90                                                                          |
| $V$ (Å <sup>3</sup> )                                                       | 1427.5 (2)                                                                          | 5955 (2)                                                                            |
| $Z$                                                                         | 2                                                                                   | 8                                                                                   |
| $\mu$ (mm <sup>-1</sup> )                                                   | 0.85                                                                                | 0.83                                                                                |
| Crystal size (mm)                                                           | 0.47 × 0.40 × 0.25                                                                  | 0.45 × 0.37 × 0.29                                                                  |
| <b>Data collection</b>                                                      |                                                                                     |                                                                                     |
| $T_{\min}, T_{\max}$                                                        | 0.629, 0.746                                                                        | 0.646, 0.746                                                                        |
| No. of measured, independent, and observed [ $I > 2\sigma(I)$ ] reflections | 20264, 6557, 5861                                                                   | 35583, 6819, 5734                                                                   |
| $R_{\text{int}}$                                                            | 0.027                                                                               | 0.052                                                                               |
| $(\sin \theta/\lambda)_{\text{max}}$ (Å <sup>-1</sup> )                     | 0.650                                                                               | 0.650                                                                               |
| <b>Refinement</b>                                                           |                                                                                     |                                                                                     |
| $R[F^2 > 2\sigma(F^2)], wR(F^2), S$                                         | 0.028, 0.075, 1.06                                                                  | 0.032, 0.084, 1.06                                                                  |
| No. of reflections                                                          | 6557                                                                                | 6819                                                                                |
| No. of parameters                                                           | 354                                                                                 | 381                                                                                 |
| No. of restraints                                                           | 0                                                                                   | 0                                                                                   |
|                                                                             | $w = 1/[\sigma^2(F_o^2) + (0.0355P)^2 + 0.5015P]$<br>where $P = (F_o^2 + 2F_c^2)/3$ | $w = 1/[\sigma^2(F_o^2) + (0.0366P)^2 + 1.6659P]$<br>where $P = (F_o^2 + 2F_c^2)/3$ |
| $\Delta\rho_{\text{max}}, \Delta\rho_{\text{min}}$ (e Å <sup>-3</sup> )     | 0.37, -0.39                                                                         | 0.35, -0.39                                                                         |

**Table S2.** Crystallographic summary for **Cu3** and **Cu4**.

|                                                                                                                | Cu(PhNacNac <sup>Me</sup> )(PPh <sup>OMe3</sup> ) ( <b>Cu3</b> )                                                                                                                                                    | Cu(CyNacNac <sup>Me</sup> )(PPh <sub>3</sub> ) ( <b>Cu4</b> )                                                                                                                                  |
|----------------------------------------------------------------------------------------------------------------|---------------------------------------------------------------------------------------------------------------------------------------------------------------------------------------------------------------------|------------------------------------------------------------------------------------------------------------------------------------------------------------------------------------------------|
| CCDC                                                                                                           | 2382412                                                                                                                                                                                                             | 2382413                                                                                                                                                                                        |
| <b>Crystal data</b>                                                                                            |                                                                                                                                                                                                                     |                                                                                                                                                                                                |
| Chemical formula                                                                                               | C <sub>38</sub> H <sub>38</sub> CuN <sub>2</sub> O <sub>3</sub> P                                                                                                                                                   | C <sub>35</sub> H <sub>44</sub> CuN <sub>2</sub> P                                                                                                                                             |
| <i>M<sub>r</sub></i>                                                                                           | 665.21                                                                                                                                                                                                              | 587.23                                                                                                                                                                                         |
| Crystal system, space group                                                                                    | Monoclinic, <i>P</i> <sub>2</sub> <sub>1</sub> / <i>c</i>                                                                                                                                                           | Orthorhombic, <i>P</i> <sub>2</sub> <sub>1</sub> <sub>2</sub> <sub>1</sub>                                                                                                                     |
| Temperature (K)                                                                                                | 123                                                                                                                                                                                                                 | 123                                                                                                                                                                                            |
| <i>a</i> , <i>b</i> , <i>c</i> (Å)                                                                             | 11.3887 (16), 26.548 (4), 11.0375 (15)                                                                                                                                                                              | 11.642 (2), 14.434 (3), 21.728 (4)                                                                                                                                                             |
| $\alpha$ , $\beta$ , $\gamma$ (°)                                                                              | 90, 100.983 (2), 90                                                                                                                                                                                                 | 90, 90, 90                                                                                                                                                                                     |
| <i>V</i> (Å <sup>3</sup> )                                                                                     | 3276.0 (8)                                                                                                                                                                                                          | 3651.5 (11)                                                                                                                                                                                    |
| <i>Z</i>                                                                                                       | 4                                                                                                                                                                                                                   | 4                                                                                                                                                                                              |
| $\mu$ (mm <sup>-1</sup> )                                                                                      | 0.76                                                                                                                                                                                                                | 0.66                                                                                                                                                                                           |
| Crystal size (mm)                                                                                              | 0.48 × 0.46 × 0.21                                                                                                                                                                                                  | 0.41 × 0.19 × 0.18                                                                                                                                                                             |
| <b>Data collection</b>                                                                                         |                                                                                                                                                                                                                     |                                                                                                                                                                                                |
| <i>T<sub>min</sub></i> , <i>T<sub>max</sub></i>                                                                | 0.628, 0.746                                                                                                                                                                                                        | 0.859, 1.000                                                                                                                                                                                   |
| No. of measured, independent, and observed [ <i>I</i> > 2σ( <i>I</i> )] reflections                            | 16937, 5776, 5234                                                                                                                                                                                                   | 21094, 7444, 7075                                                                                                                                                                              |
| <i>R<sub>int</sub></i>                                                                                         | 0.025                                                                                                                                                                                                               | 0.026                                                                                                                                                                                          |
| (sin $\theta/\lambda$ ) <sub>max</sub> (Å <sup>-1</sup> )                                                      | 0.595                                                                                                                                                                                                               | 0.626                                                                                                                                                                                          |
| <b>Refinement</b>                                                                                              |                                                                                                                                                                                                                     |                                                                                                                                                                                                |
| <i>R</i> [ <i>F</i> <sup>2</sup> > 2σ( <i>F</i> <sup>2</sup> )], <i>wR</i> ( <i>F</i> <sup>2</sup> ), <i>S</i> | 0.027, 0.071, 1.05                                                                                                                                                                                                  | 0.021, 0.051, 1.02                                                                                                                                                                             |
| No. of reflections                                                                                             | 5776                                                                                                                                                                                                                | 7444                                                                                                                                                                                           |
| No. of parameters                                                                                              | 411                                                                                                                                                                                                                 | 354                                                                                                                                                                                            |
| No. of restraints                                                                                              | 0                                                                                                                                                                                                                   | 0                                                                                                                                                                                              |
|                                                                                                                | w = 1/[σ <sup>2</sup> ( <i>F<sub>o</sub></i> <sup>2</sup> ) + (0.0318 <i>P</i> ) <sup>2</sup> + 1.6905 <i>P</i> ]<br>where <i>P</i> = ( <i>F<sub>o</sub></i> <sup>2</sup> + 2 <i>F<sub>c</sub></i> <sup>2</sup> )/3 | w = 1/[σ <sup>2</sup> ( <i>F<sub>o</sub></i> <sup>2</sup> ) + (0.0223 <i>P</i> ) <sup>2</sup> ] where <i>P</i> = ( <i>F<sub>o</sub></i> <sup>2</sup> + 2 <i>F<sub>c</sub></i> <sup>2</sup> )/3 |
| Δρ <sub>max</sub> , Δρ <sub>min</sub> (e Å <sup>-3</sup> )                                                     | 0.29, -0.36                                                                                                                                                                                                         | 0.25, -0.18                                                                                                                                                                                    |

**Table S3.** Crystallographic summary for **Cu5** and **Cu6**.

|                                                                                                                | Cu(PhNacNac <sup>CF3</sup> )(PPh <sub>3</sub> ) ( <b>Cu5</b> )                      | Cu(dmpNacNac <sup>Me</sup> )(PPh <sub>3</sub> ) ( <b>Cu6</b> )                      |
|----------------------------------------------------------------------------------------------------------------|-------------------------------------------------------------------------------------|-------------------------------------------------------------------------------------|
| CCDC                                                                                                           | 2382415                                                                             | 2382416                                                                             |
| <b>Crystal data</b>                                                                                            |                                                                                     |                                                                                     |
| Chemical formula                                                                                               | C <sub>35</sub> H <sub>26</sub> CuF <sub>6</sub> N <sub>2</sub> P                   | C <sub>39</sub> H <sub>40</sub> CuN <sub>2</sub> P                                  |
| <i>M<sub>r</sub></i>                                                                                           | 683.09                                                                              | 631.24                                                                              |
| Crystal system, space group                                                                                    | Triclinic, <i>P</i> $\bar{1}$                                                       | Monoclinic, <i>P</i> 2 <sub>1</sub> / <i>c</i>                                      |
| Temperature (K)                                                                                                | 123                                                                                 | 183                                                                                 |
| <i>a</i> , <i>b</i> , <i>c</i> (Å)                                                                             | 8.8151 (15), 12.675 (2), 14.113 (2)                                                 | 10.5139 (14), 20.262 (3), 16.342 (2)                                                |
| $\alpha$ , $\beta$ , $\gamma$ (°)                                                                              | 98.290 (2), 108.137 (2), 92.018 (2)                                                 | 90, 104.617 (2), 90                                                                 |
| <i>V</i> (Å <sup>3</sup> )                                                                                     | 1477.5 (4)                                                                          | 3368.6 (8)                                                                          |
| <i>Z</i>                                                                                                       | 2                                                                                   | 4                                                                                   |
| $\mu$ (mm <sup>-1</sup> )                                                                                      | 0.86                                                                                | 0.73                                                                                |
| Crystal size (mm)                                                                                              | 0.45 × 0.42 × 0.39                                                                  | 0.48 × 0.46 × 0.08                                                                  |
| <b>Data collection</b>                                                                                         |                                                                                     |                                                                                     |
| <i>T<sub>min</sub></i> , <i>T<sub>max</sub></i>                                                                | 0.609, 0.746                                                                        | 0.663, 0.746                                                                        |
| No. of measured, independent, and observed [ <i>I</i> > 2σ( <i>I</i> )] reflections                            | 21107, 6845, 6277                                                                   | 21049, 7717, 6142                                                                   |
| <i>R<sub>int</sub></i>                                                                                         | 0.026                                                                               | 0.035                                                                               |
| (sin $\theta/\lambda$ ) <sub>max</sub> (Å <sup>-1</sup> )                                                      | 0.652                                                                               | 0.651                                                                               |
| <b>Refinement</b>                                                                                              |                                                                                     |                                                                                     |
| <i>R</i> [ <i>F</i> <sup>2</sup> > 2σ( <i>F</i> <sup>2</sup> )], <i>wR</i> ( <i>F</i> <sup>2</sup> ), <i>S</i> | 0.029, 0.078, 1.05                                                                  | 0.035, 0.090, 1.06                                                                  |
| No. of reflections                                                                                             | 6845                                                                                | 7717                                                                                |
| No. of parameters                                                                                              | 406                                                                                 | 394                                                                                 |
| No. of restraints                                                                                              | 0                                                                                   | 0                                                                                   |
|                                                                                                                | $w = 1/[\sigma^2(F_o^2) + (0.0398P)^2 + 0.6812P]$<br>where $P = (F_o^2 + 2F_c^2)/3$ | $w = 1/[\sigma^2(F_o^2) + (0.0386P)^2 + 0.4856P]$<br>where $P = (F_o^2 + 2F_c^2)/3$ |
| $\Delta\rho_{max}$ , $\Delta\rho_{min}$ (e Å <sup>-3</sup> )                                                   | 0.43, -0.63                                                                         | 0.25, -0.36                                                                         |

**Table S4.** Crystallographic summary for **Cu7** and **Cu8**.

|                                                                                                                   | Cu(dmpNacNac <sup>Me</sup> )(PPh <sup>OMe3</sup> )•Et <sub>2</sub> O<br>( <b>Cu7</b> •Et <sub>2</sub> O) | Cu(dippNacNac <sup>Me</sup> )(PPh <sub>3</sub> ) ( <b>Cu8</b> ) |
|-------------------------------------------------------------------------------------------------------------------|----------------------------------------------------------------------------------------------------------|-----------------------------------------------------------------|
| CCDC                                                                                                              | 2382417                                                                                                  | 2382418                                                         |
| <b>Crystal data</b>                                                                                               |                                                                                                          |                                                                 |
| Chemical formula                                                                                                  | C <sub>44</sub> H <sub>51</sub> CuN <sub>2</sub> O <sub>3.50</sub> P                                     | C <sub>47</sub> H <sub>56</sub> CuN <sub>2</sub> P              |
| <i>M</i> <sub>r</sub>                                                                                             | 758.37                                                                                                   | 743.44                                                          |
| Crystal system,<br>space group                                                                                    | Monoclinic, <i>P2</i> <sub>1</sub> / <i>c</i>                                                            | Monoclinic, <i>P2</i> <sub>1</sub> / <i>n</i>                   |
| Temperature (K)                                                                                                   | 123                                                                                                      | 123                                                             |
| <i>a</i> , <i>b</i> , <i>c</i> (Å)                                                                                | 9.7777 (16), 42.541 (7), 10.8917 (18)                                                                    | 23.339 (3), 15.8665 (19), 24.171 (3)                            |
| α, β, γ (°)                                                                                                       | 113.821 (2)                                                                                              | 111.832 (2)                                                     |
| <i>V</i> (Å <sup>3</sup> )                                                                                        | 4144.5 (12)                                                                                              | 8308.5 (17)                                                     |
| <i>Z</i>                                                                                                          | 4                                                                                                        | 8                                                               |
| μ (mm <sup>-1</sup> )                                                                                             | 0.61                                                                                                     | 0.60                                                            |
| Crystal size (mm)                                                                                                 | 0.39 × 0.23 × 0.08                                                                                       | 0.40 × 0.16 × 0.10                                              |
| <b>Data collection</b>                                                                                            |                                                                                                          |                                                                 |
| <i>T</i> <sub>min</sub> , <i>T</i> <sub>max</sub>                                                                 | 0.612, 0.746                                                                                             | 0.689, 0.746                                                    |
| No. of measured,<br>independent, and<br>observed [ <i>I</i> > 2σ( <i>I</i> )]<br>reflections                      | 22454, 8781, 6947                                                                                        | 49826, 18268, 12937                                             |
| <i>R</i> <sub>int</sub>                                                                                           | 0.056                                                                                                    | 0.039                                                           |
| (sin θ/λ) <sub>max</sub> (Å <sup>-1</sup> )                                                                       | 0.633                                                                                                    | 0.641                                                           |
| <b>Refinement</b>                                                                                                 |                                                                                                          |                                                                 |
| <i>R</i> [ <i>F</i> <sup>2</sup> > 2σ( <i>F</i> <sup>2</sup> )],<br><i>wR</i> ( <i>F</i> <sup>2</sup> ), <i>S</i> | 0.115, 0.261, 1.25                                                                                       | 0.039, 0.099, 1.03                                              |
| No. of reflections                                                                                                | 8781                                                                                                     | 18268                                                           |
| No. of parameters                                                                                                 | 496                                                                                                      | 939                                                             |
| No. of restraints                                                                                                 | 34                                                                                                       | 0                                                               |
|                                                                                                                   | $w = 1/[s^2(F_o^2) + (0.0316P)^2 + 45.0264P]$<br>where $P = (F_o^2 + 2F_c^2)/3$                          |                                                                 |
| Δρ <sub>max</sub> , Δρ <sub>min</sub> (e Å <sup>-3</sup> )                                                        | 1.41, -1.55                                                                                              | 0.36, -0.36                                                     |

**Table S5.** Crystallographic summary for **Cu9**.

|                                                                                                                   |                                                                                                                                             |
|-------------------------------------------------------------------------------------------------------------------|---------------------------------------------------------------------------------------------------------------------------------------------|
|                                                                                                                   | Cu(dippNacNac <sup>Me</sup> )(PPh <sup>OMe3</sup> )<br>•0.5C <sub>6</sub> H <sub>14</sub> ( <b>Cu9</b> •0.5C <sub>6</sub> H <sub>14</sub> ) |
| CCDC                                                                                                              | 2382419                                                                                                                                     |
| <b>Crystal data</b>                                                                                               |                                                                                                                                             |
| Chemical formula                                                                                                  | C <sub>53</sub> H <sub>68</sub> CuN <sub>2</sub> O <sub>3</sub> P                                                                           |
| <i>M<sub>r</sub></i>                                                                                              | 875.60                                                                                                                                      |
| Crystal system,<br>space group                                                                                    | Triclinic, <i>P</i> $\bar{1}$                                                                                                               |
| Temperature (K)                                                                                                   | 123                                                                                                                                         |
| <i>a</i> , <i>b</i> , <i>c</i> (Å)                                                                                | 11.644 (5), 13.759 (5), 16.739 (6)                                                                                                          |
| $\alpha$ , $\beta$ , $\gamma$ (°)                                                                                 | 104.706 (5), 90.348 (5), 101.897 (5)                                                                                                        |
| <i>V</i> (Å <sup>3</sup> )                                                                                        | 2533.3 (17)                                                                                                                                 |
| <i>Z</i>                                                                                                          | 2                                                                                                                                           |
| $\mu$ (mm <sup>-1</sup> )                                                                                         | 0.50                                                                                                                                        |
| Crystal size (mm)                                                                                                 | 0.42 × 0.40 × 0.23                                                                                                                          |
| <b>Data collection</b>                                                                                            |                                                                                                                                             |
| <i>T<sub>min</sub></i> , <i>T<sub>max</sub></i>                                                                   | 0.687, 0.746                                                                                                                                |
| No. of measured,<br>independent, and<br>observed [ <i>I</i> > 2σ( <i>I</i> )]<br>reflections                      | 34092, 10746, 8533                                                                                                                          |
| <i>R<sub>int</sub></i>                                                                                            | 0.053                                                                                                                                       |
| (sin $\theta/\lambda$ ) <sub>max</sub> (Å <sup>-1</sup> )                                                         | 0.633                                                                                                                                       |
| <b>Refinement</b>                                                                                                 |                                                                                                                                             |
| <i>R</i> [ <i>F</i> <sup>2</sup> > 2σ( <i>F</i> <sup>2</sup> )],<br><i>wR</i> ( <i>F</i> <sup>2</sup> ), <i>S</i> | 0.049, 0.148, 1.05                                                                                                                          |
| No. of reflections                                                                                                | 10746                                                                                                                                       |
| No. of parameters                                                                                                 | 582                                                                                                                                         |
| No. of restraints                                                                                                 | 55                                                                                                                                          |
|                                                                                                                   | $w = 1/[\sigma^2(F_o^2) + (0.0754P)^2 + 1.4460P]$<br>where $P = (F_o^2 + 2F_c^2)/3$                                                         |
| $\Delta\rho_{max}$ , $\Delta\rho_{min}$ (e Å <sup>-3</sup> )                                                      | 1.27, -0.38                                                                                                                                 |

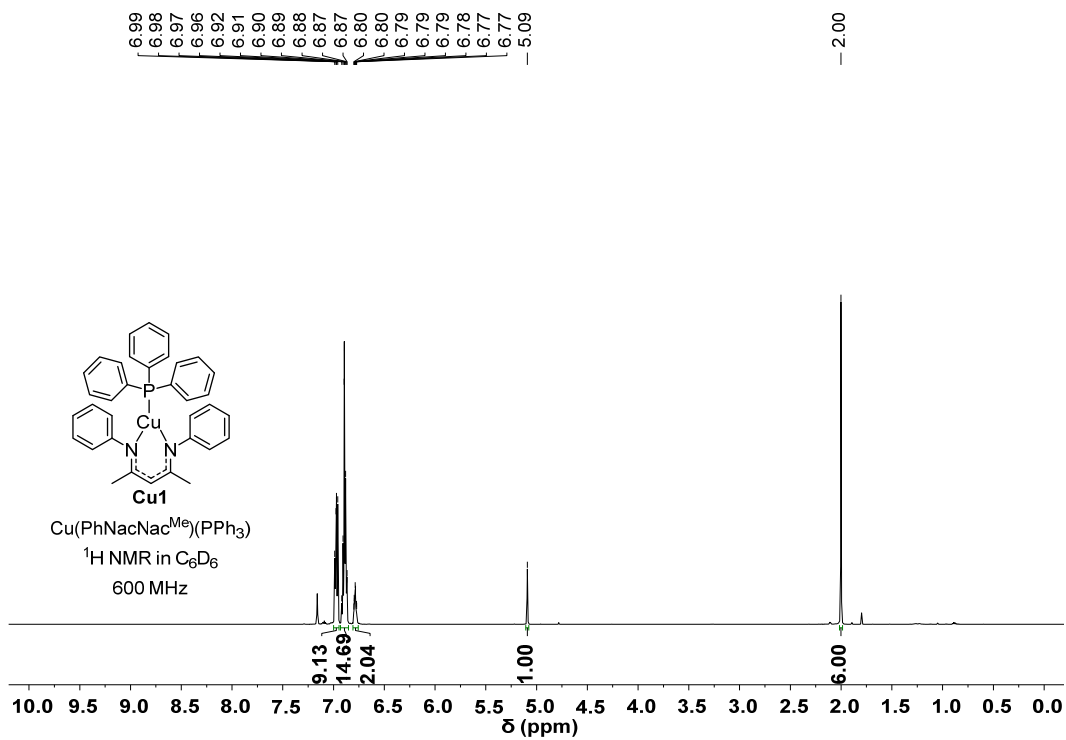

**Fig. S1.**  $^1\text{H}$  NMR spectrum of complex **Cu1**, recorded at 600 MHz in  $\text{C}_6\text{D}_6$ .

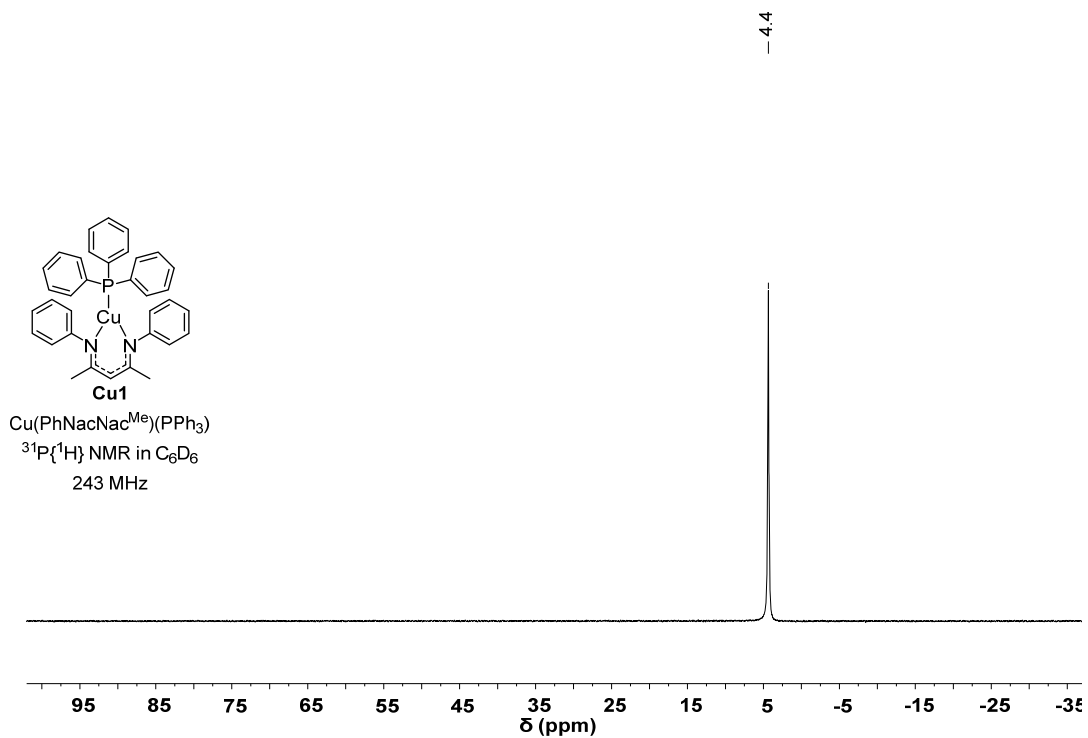

**Fig. S2.**  $^{31}\text{P}\{^1\text{H}\}$  NMR spectrum of complex **Cu1**, recorded at 243 MHz in  $\text{C}_6\text{D}_6$ .

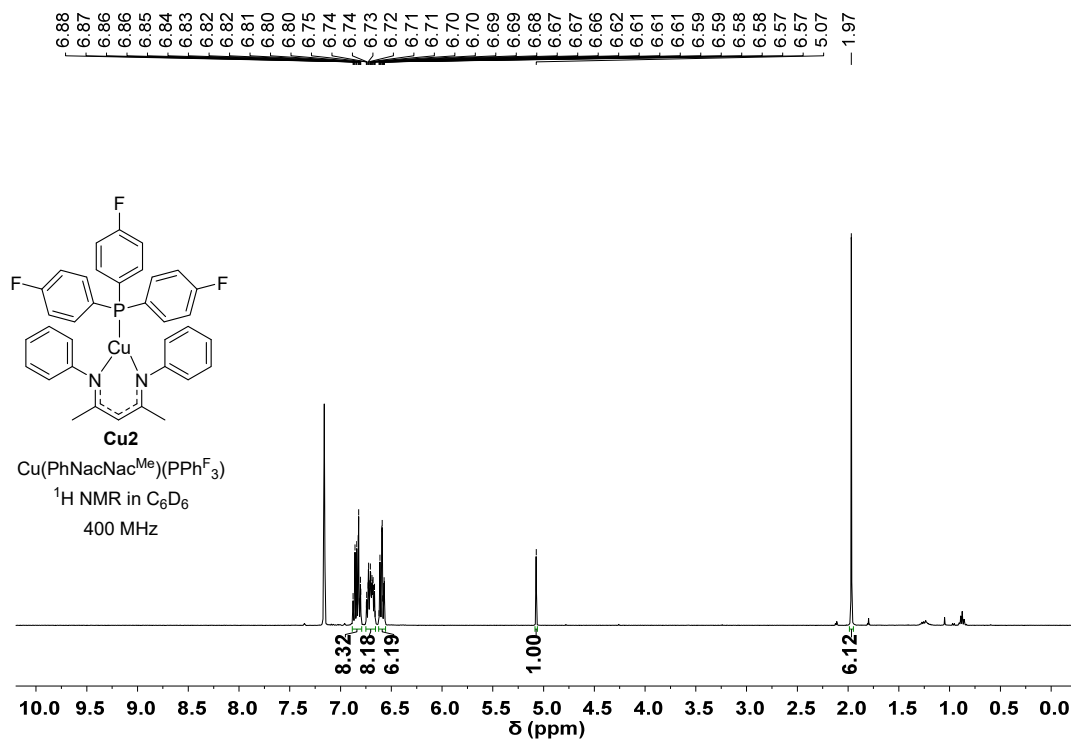

Fig. S3.  $^1\text{H}$  NMR spectrum of complex **Cu2**, recorded at 400 MHz in  $\text{C}_6\text{D}_6$ .

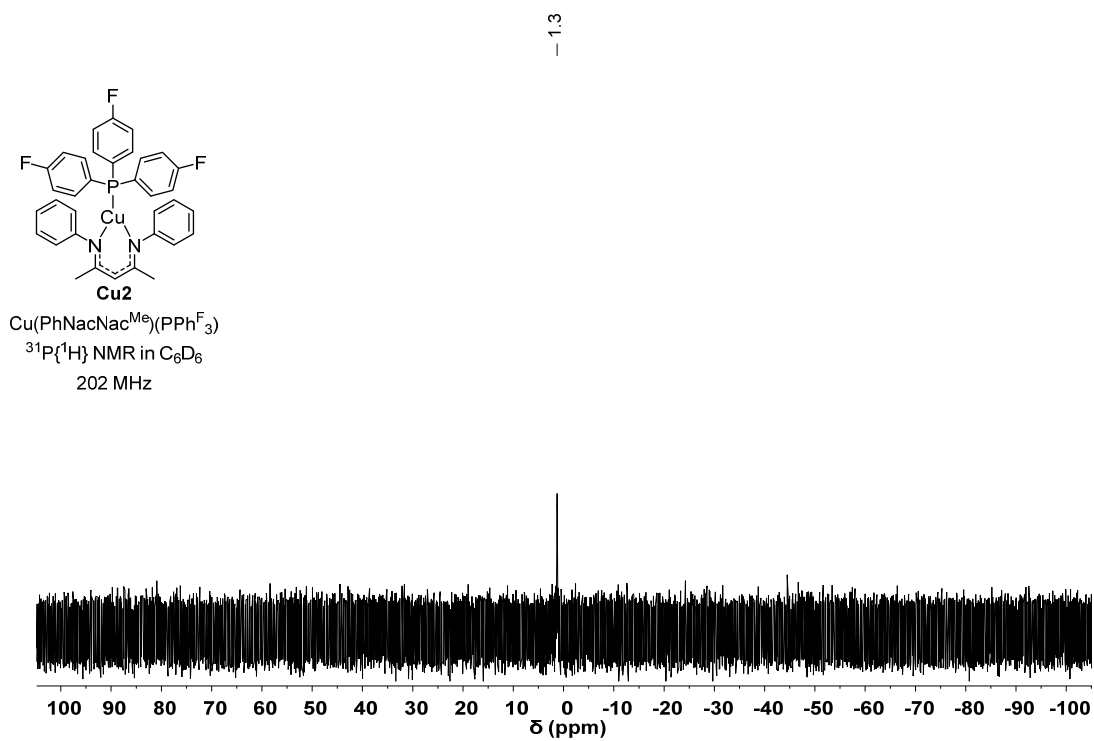

Fig. S4.  $^{31}\text{P}\{^1\text{H}\}$  NMR spectrum of complex **Cu2**, recorded at 202 MHz in  $\text{C}_6\text{D}_6$ .



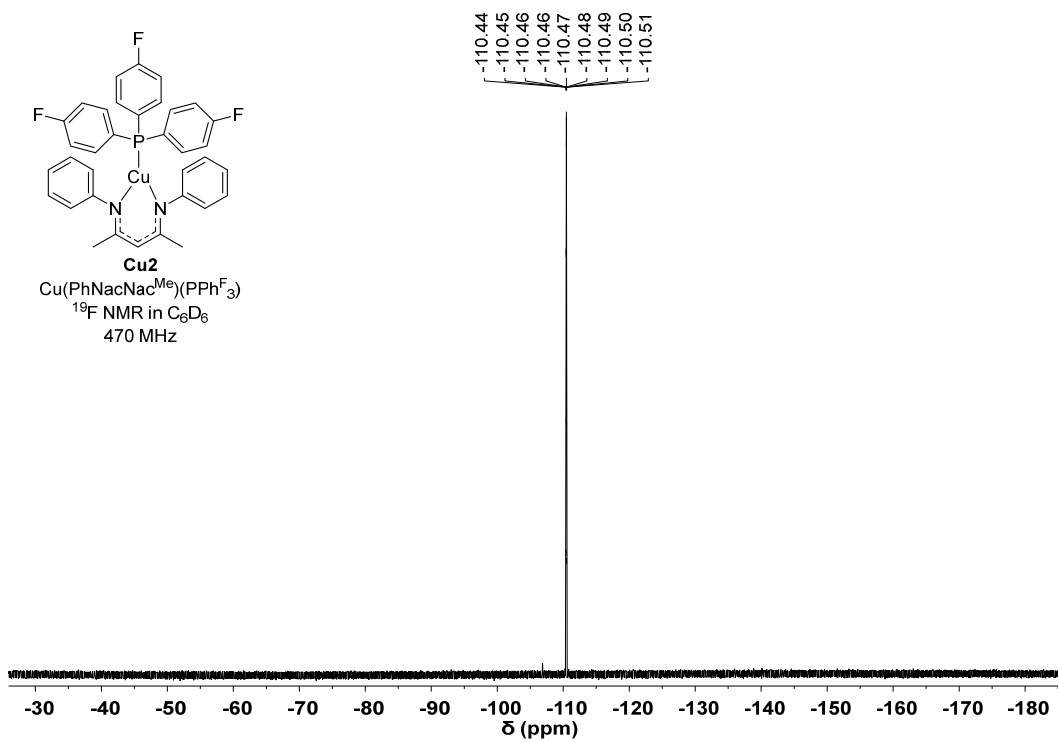

Fig. S5.  $^{19}\text{F}$  NMR spectrum of complex **Cu2**, recorded at 470 MHz in  $\text{C}_6\text{D}_6$ .

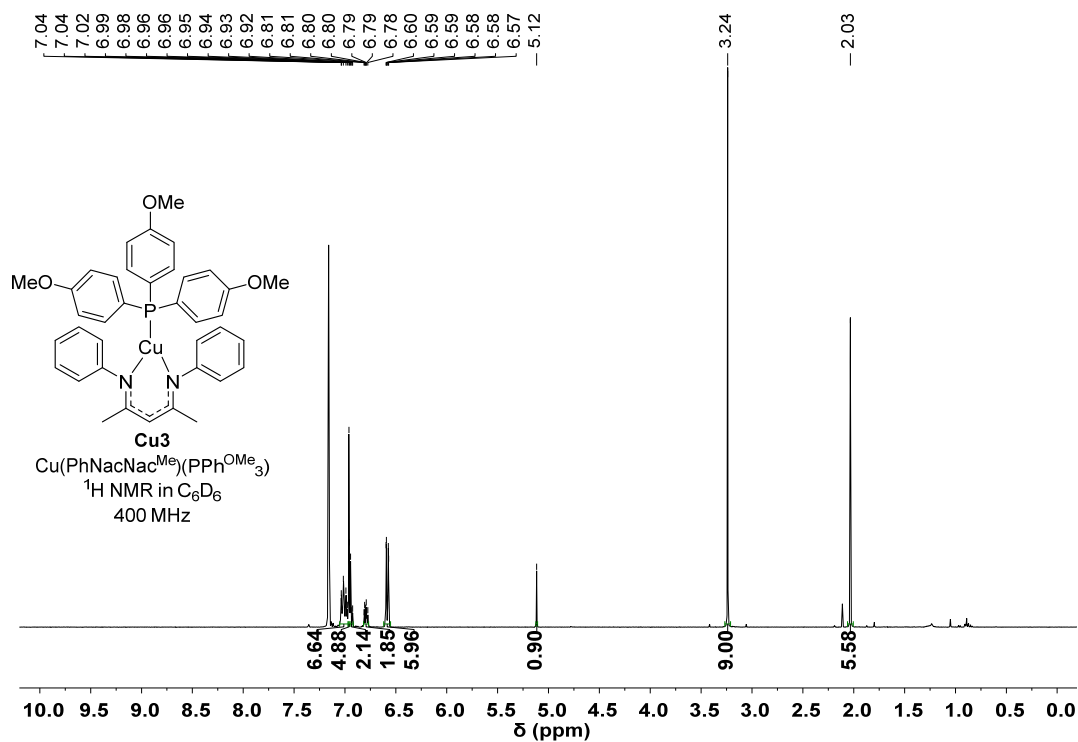

Fig. S6.  $^1\text{H}$  NMR spectrum of complex **Cu3**, recorded at 400 MHz in  $\text{C}_6\text{D}_6$ .

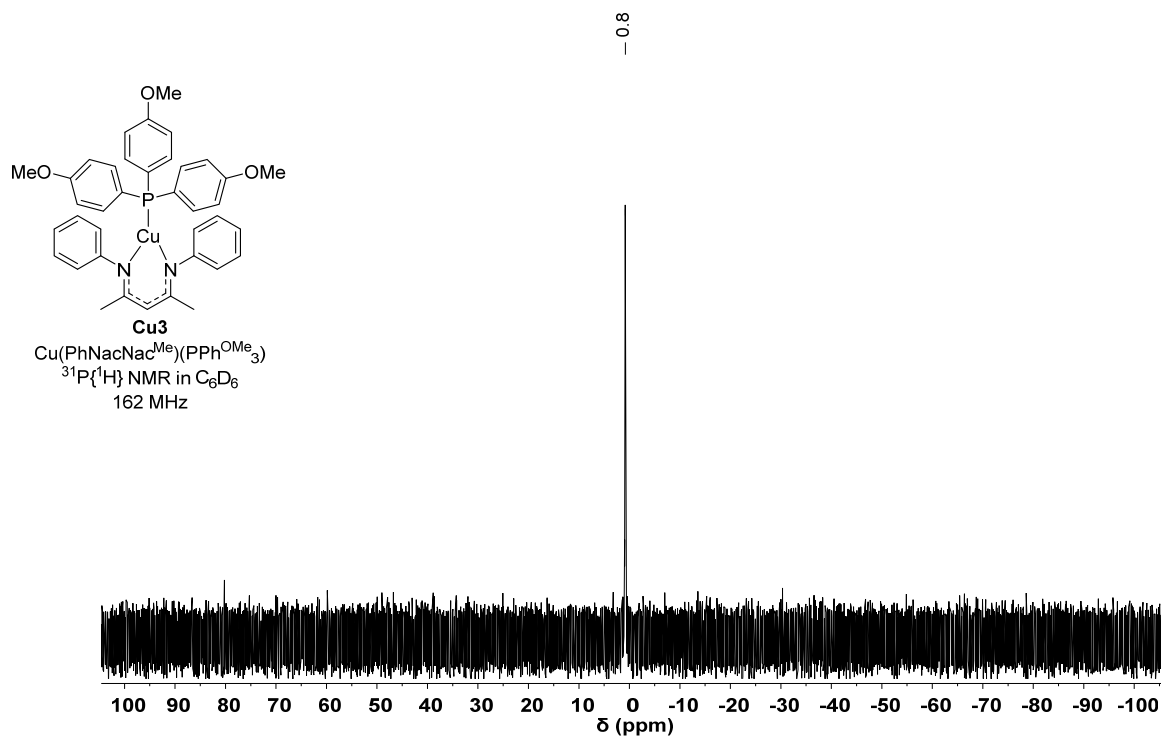

Fig. S7.  $^{31}\text{P}\{^1\text{H}\}$  NMR spectrum of complex **Cu3**, recorded at 162 MHz in  $\text{C}_6\text{D}_6$ .

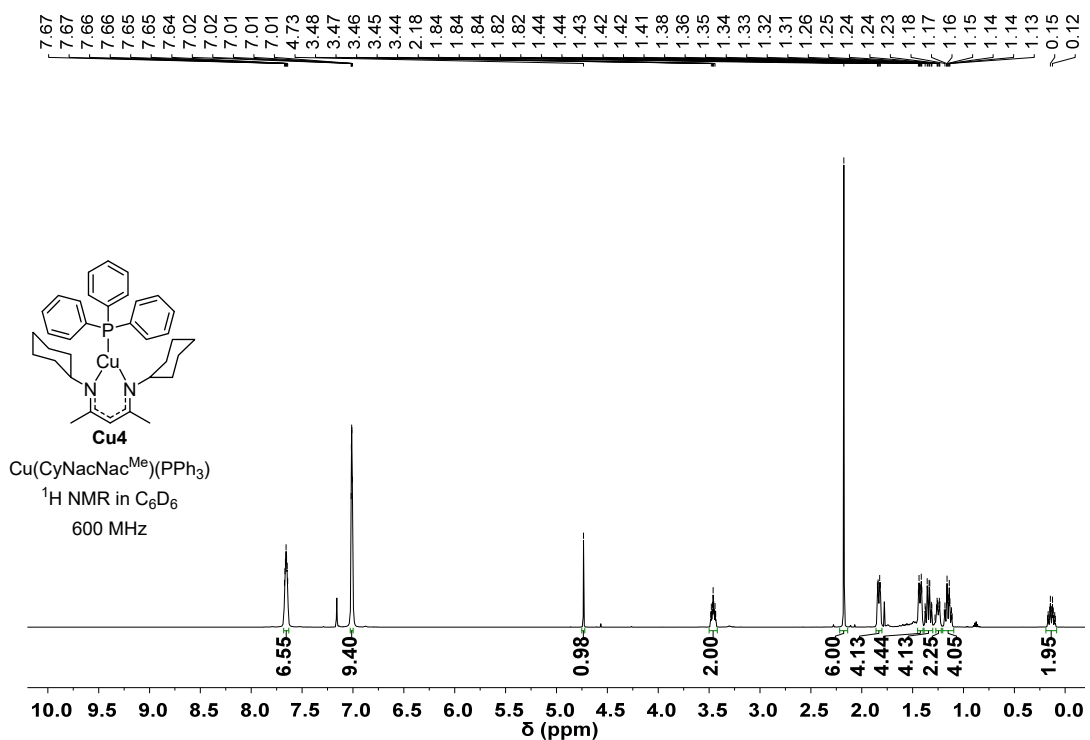

Fig. S8.  $^1\text{H}$  NMR spectrum of complex **Cu4**, recorded at 600 MHz in  $\text{C}_6\text{D}_6$ .

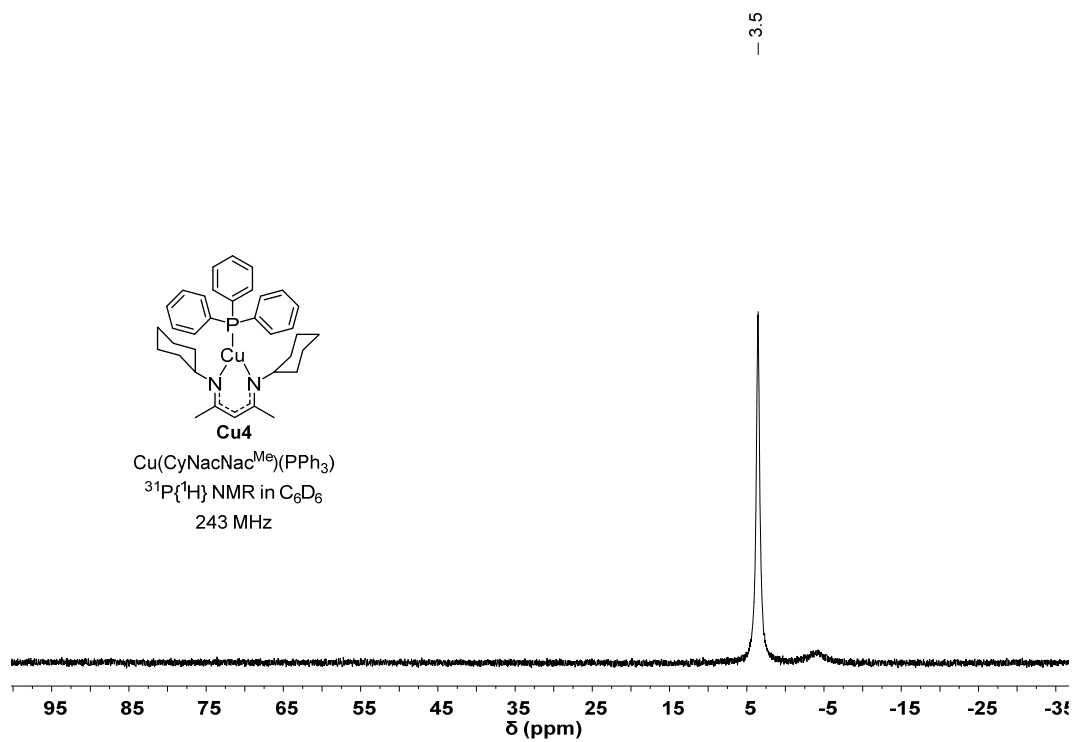

**Fig. S9.** <sup>31</sup>P{<sup>1</sup>H} NMR spectrum of complex **Cu4**, recorded at 243 MHz in C<sub>6</sub>D<sub>6</sub>.

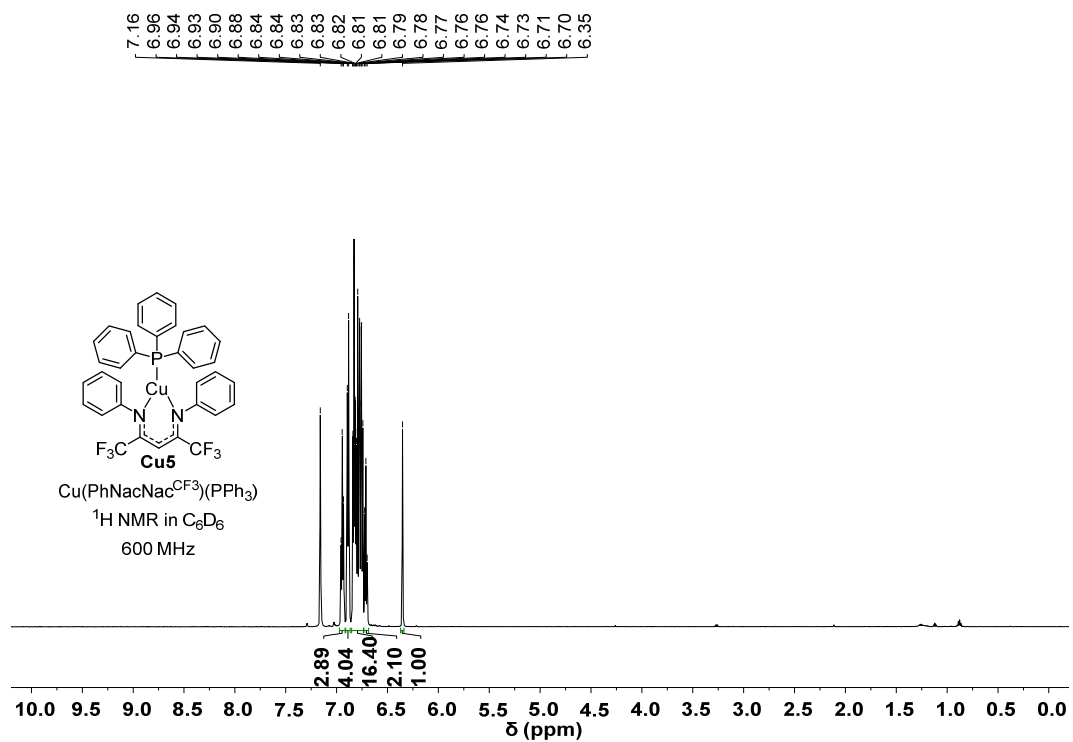

**Fig. S10.** <sup>1</sup>H NMR spectrum of complex **Cu5**, recorded at 600 MHz in C<sub>6</sub>D<sub>6</sub>.

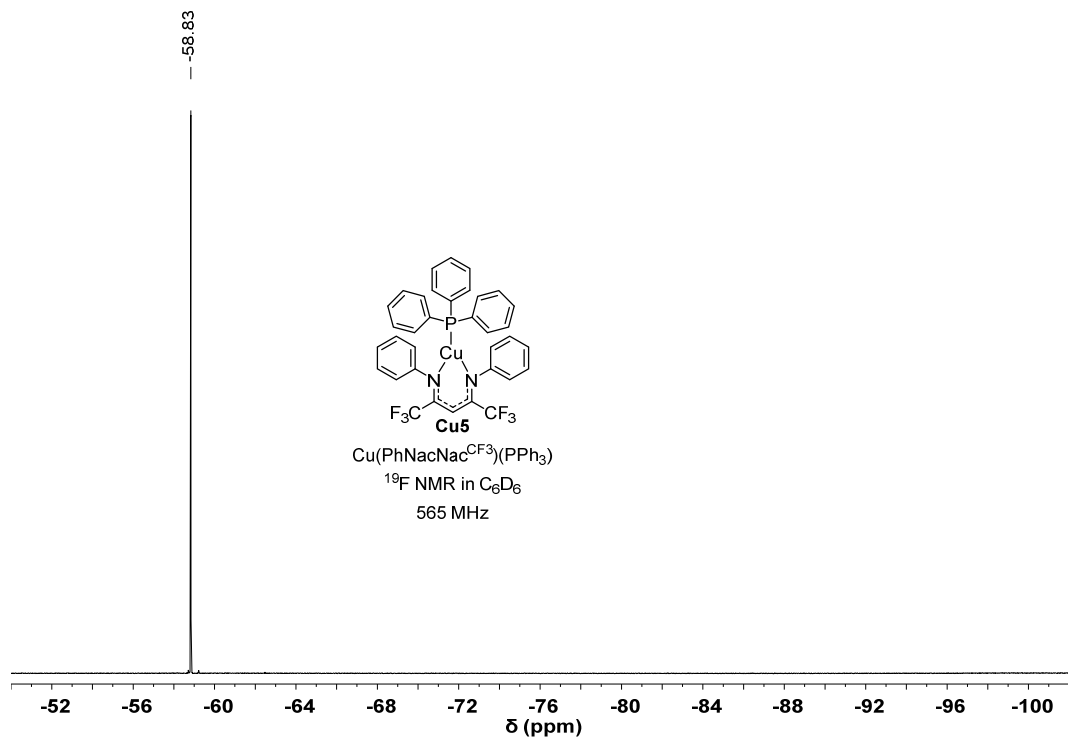

**Fig. S11.**  $^{19}\text{F}$  NMR spectrum of complex **Cu5**, recorded at 565 MHz in  $\text{C}_6\text{D}_6$ .

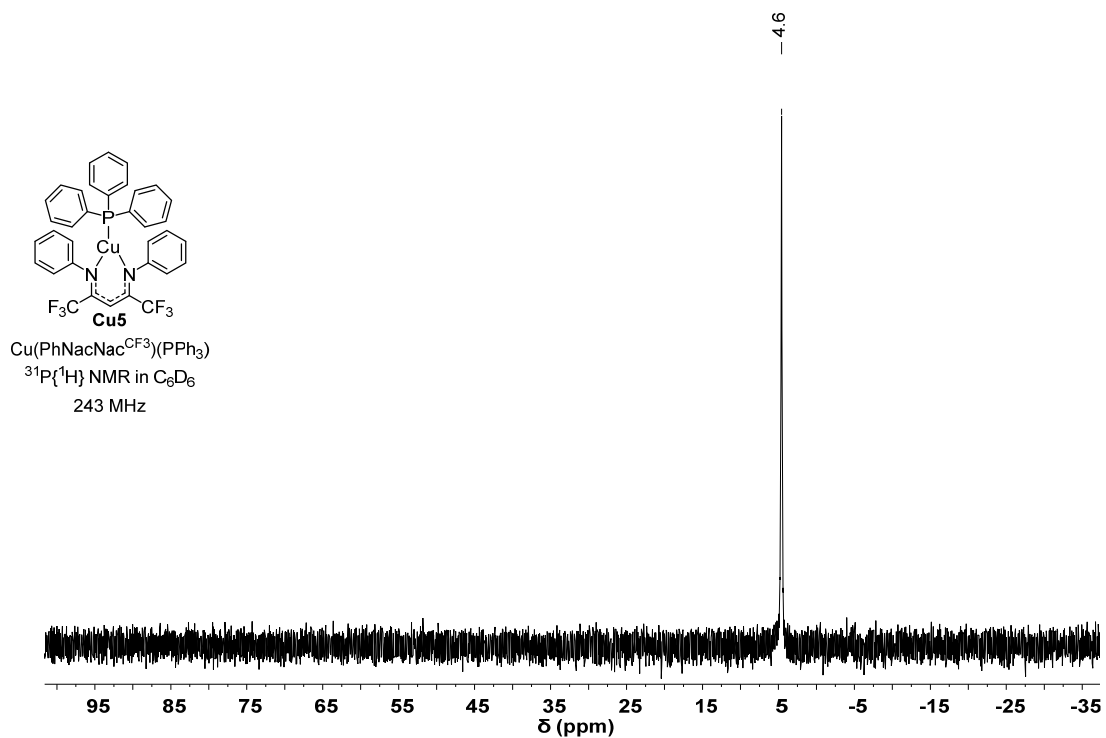

**Fig. S12.**  $^{31}\text{P}\{^1\text{H}\}$  NMR spectrum of complex **Cu5**, recorded at 243 MHz in  $\text{C}_6\text{D}_6$ .

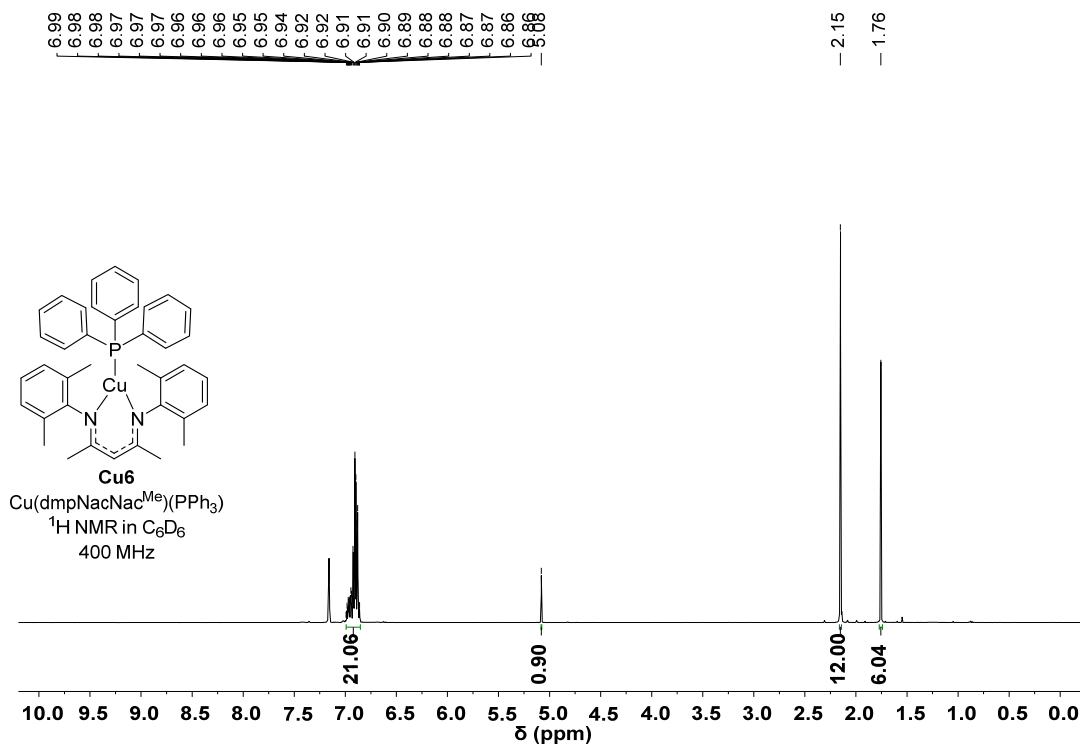

Fig. S13.  $^1\text{H}$  NMR spectrum of complex **Cu6**, recorded at 400 MHz in  $\text{C}_6\text{D}_6$ .

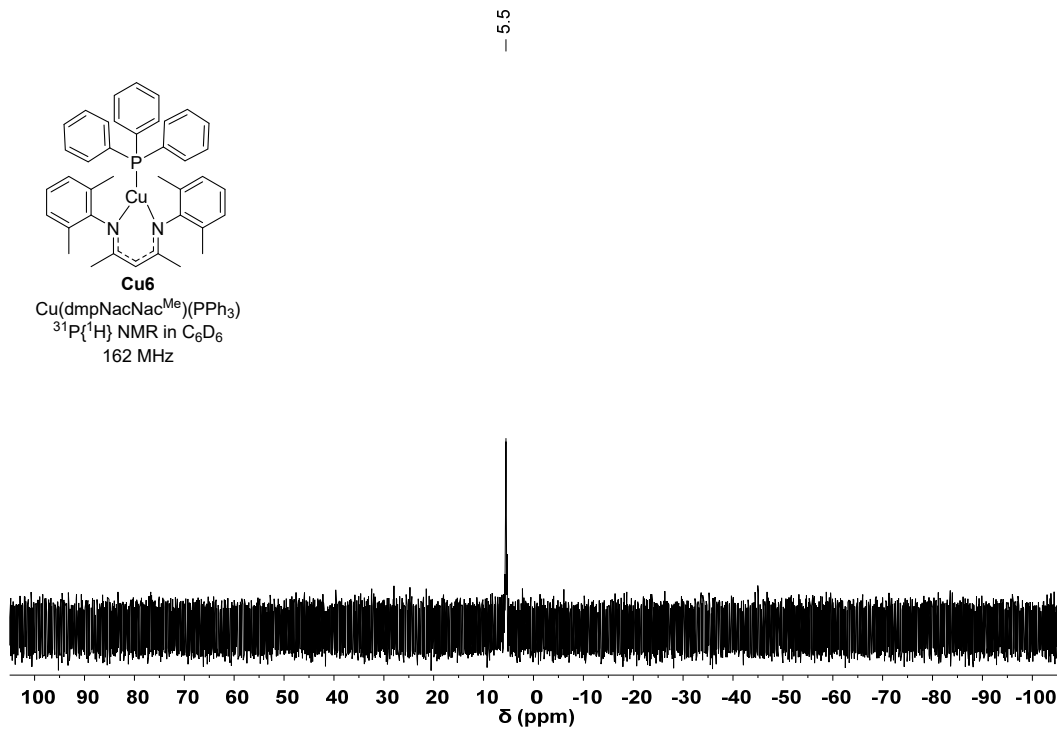

Fig. S14.  $^{31}\text{P}\{^1\text{H}\}$  NMR spectrum of complex **Cu6**, recorded at 162 MHz in  $\text{C}_6\text{D}_6$ .

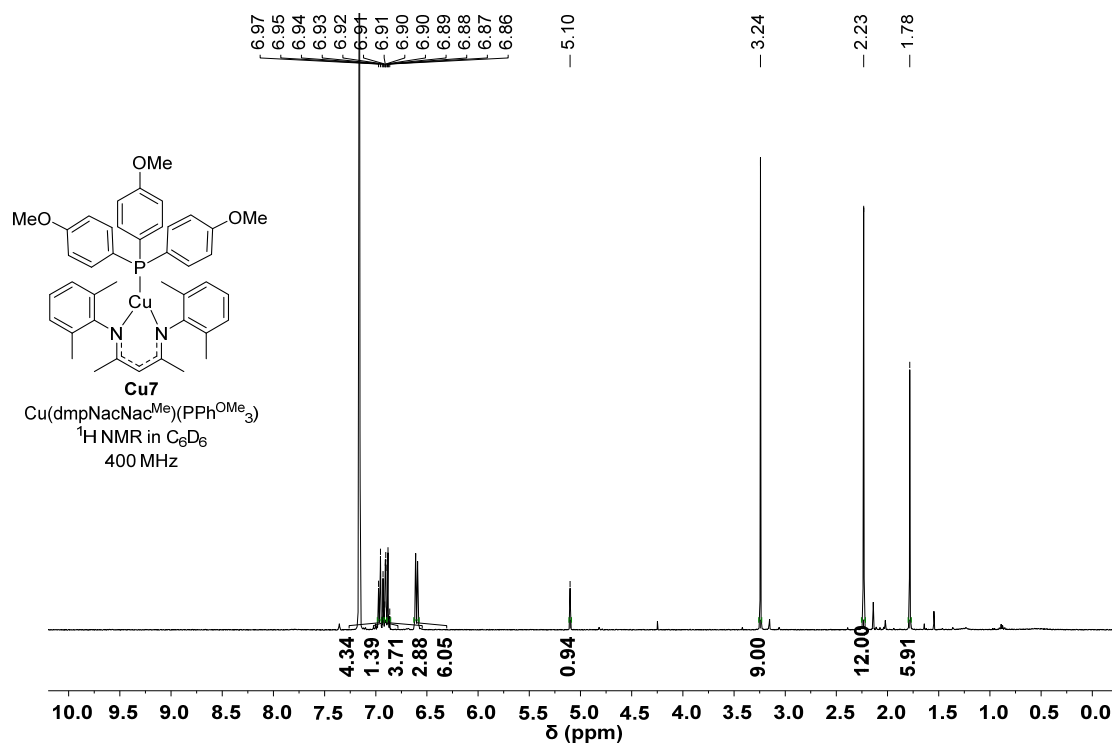

Fig. S15.  $^1\text{H}$  NMR spectrum of complex **Cu7**, recorded at 400 MHz in  $\text{C}_6\text{D}_6$ .

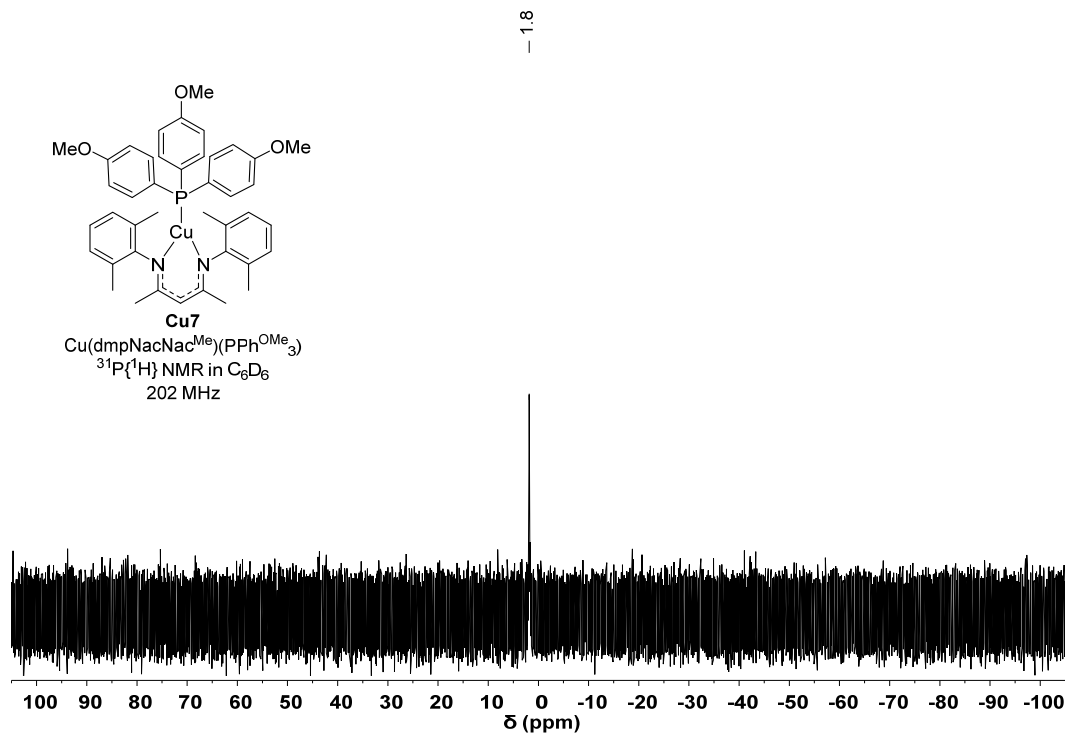

Fig. S16.  $^{31}\text{P}\{^1\text{H}\}$  NMR spectrum of complex **Cu7**, recorded at 202 MHz in  $\text{C}_6\text{D}_6$ .

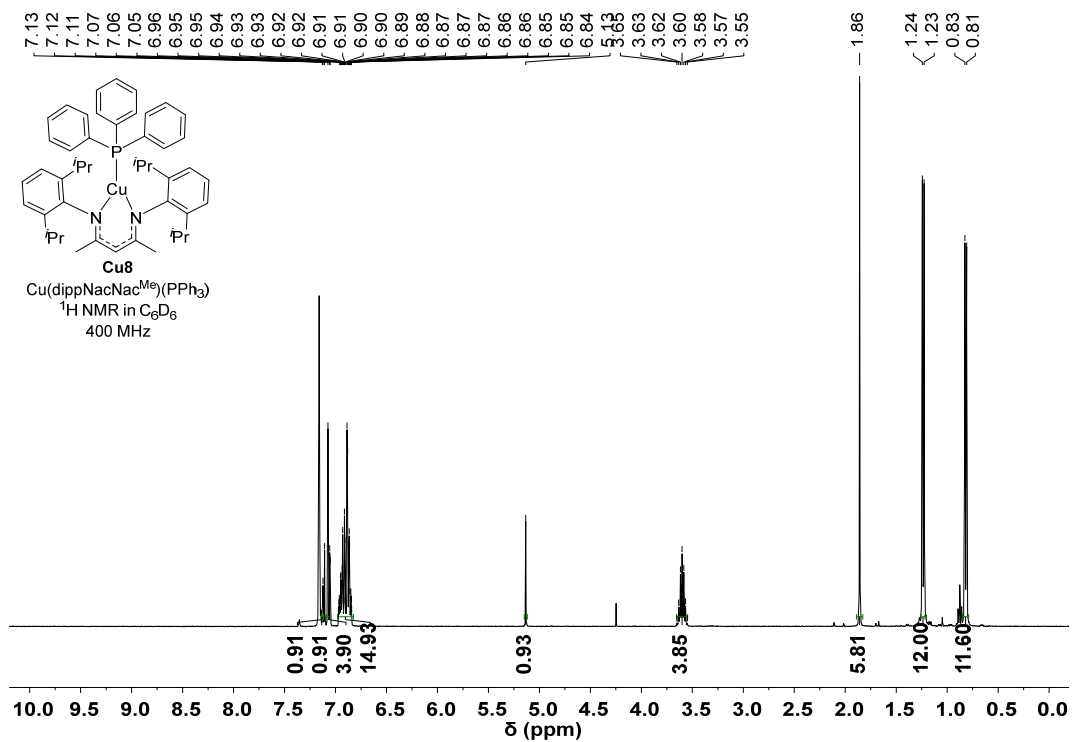

Fig. S17.  $^1\text{H}$  NMR spectrum of complex **Cu8**, recorded at 400 MHz in  $\text{C}_6\text{D}_6$ .

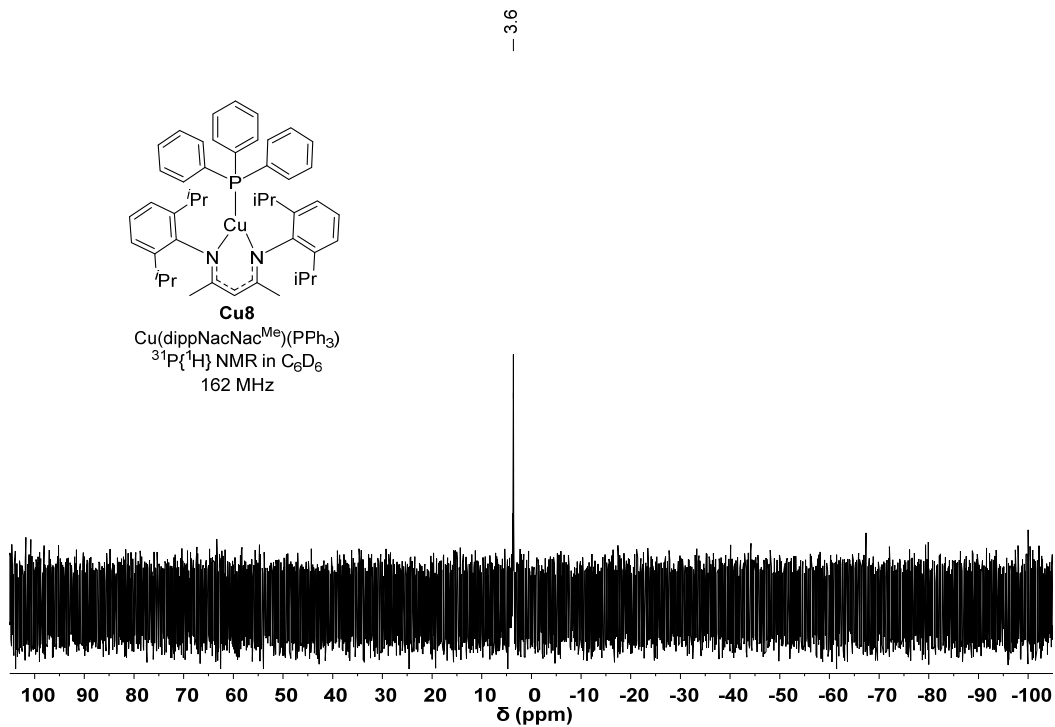

Fig. S18.  $^{31}\text{P}\{^1\text{H}\}$  NMR spectrum of complex **Cu8**, recorded at 162 MHz in  $\text{C}_6\text{D}_6$ .

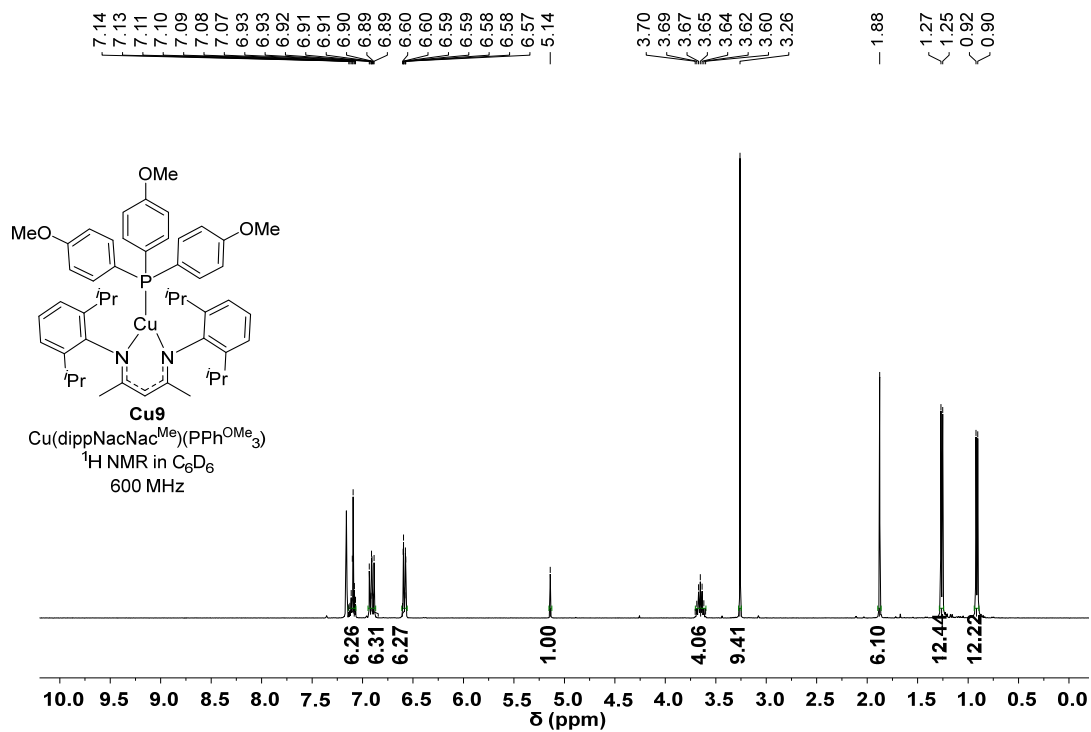

Fig. S19.  $^1\text{H}$  NMR spectrum of complex **Cu9**, recorded at 600 MHz in  $\text{C}_6\text{D}_6$ .

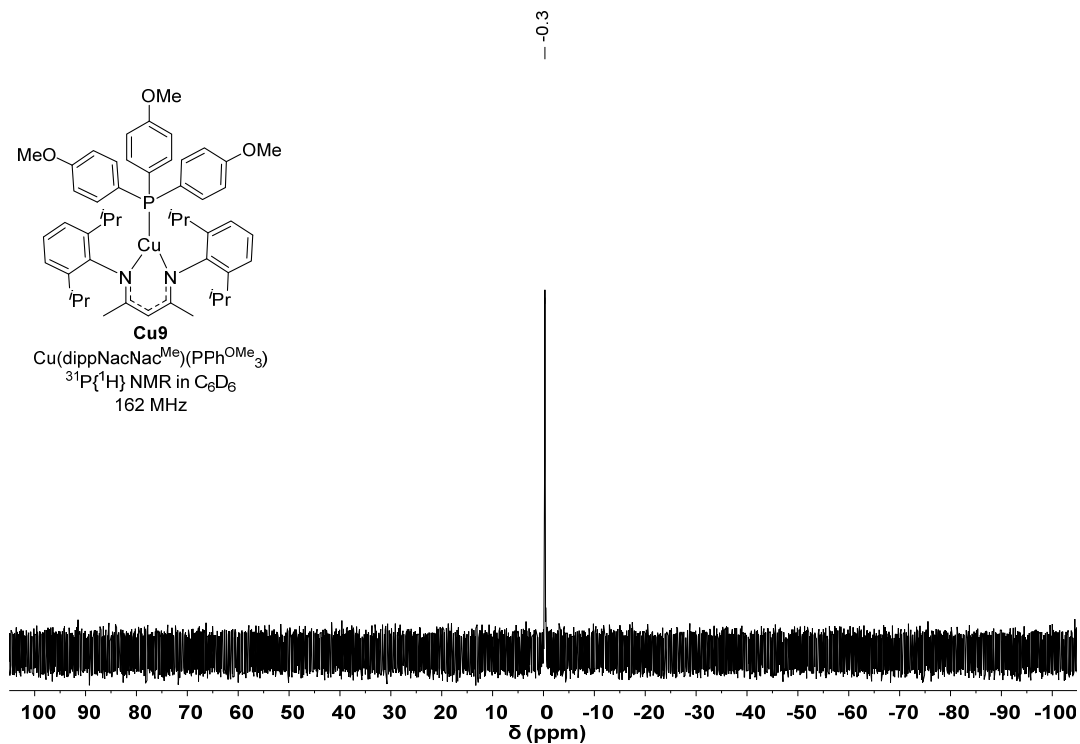

Fig. S20.  $^{31}\text{P}\{^1\text{H}\}$  NMR spectrum of complex **Cu9**, recorded at 162 MHz in  $\text{C}_6\text{D}_6$ .



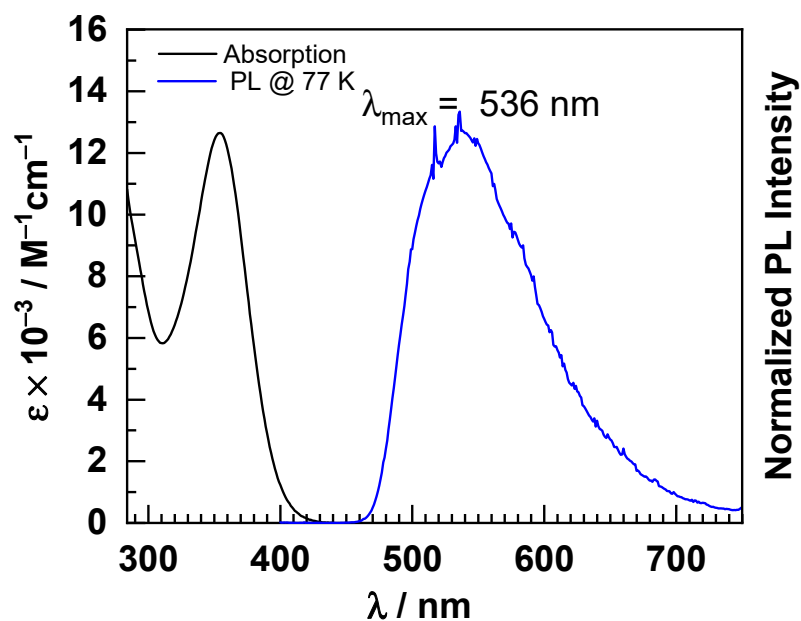

**Fig. S21.** UV-vis absorption (solid black line, 298 K) and photoluminescence (solid blue line, 77 K) spectra of **Cu1**, recorded in toluene.

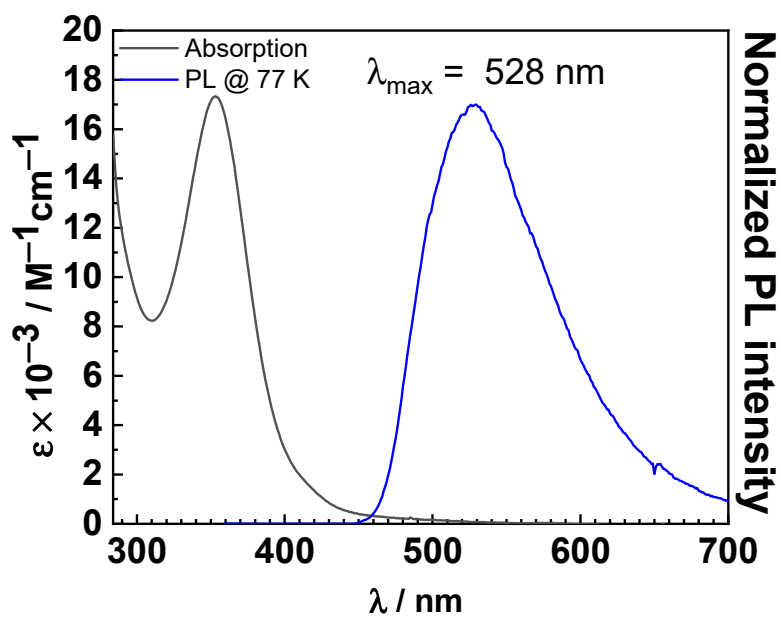

**Fig. S22.** UV-vis absorption (solid black line, 298 K) and photoluminescence (solid blue line, 77 K) spectra of **Cu2**, recorded at 298 K in toluene.

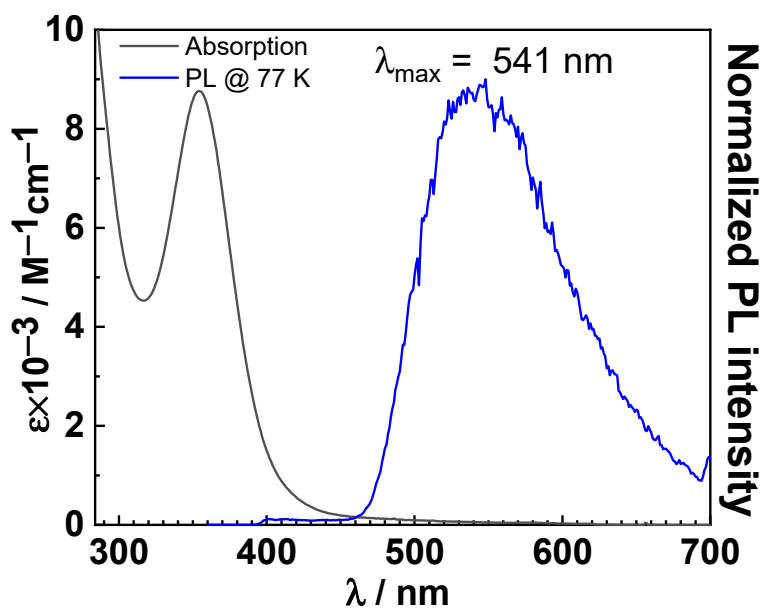

**Fig. S23.** UV-vis absorption (solid black line, 298 K) and photoluminescence (solid blue line, 77 K) spectra of **Cu<sub>3</sub>**, recorded in toluene. recorded at 298 K in toluene.

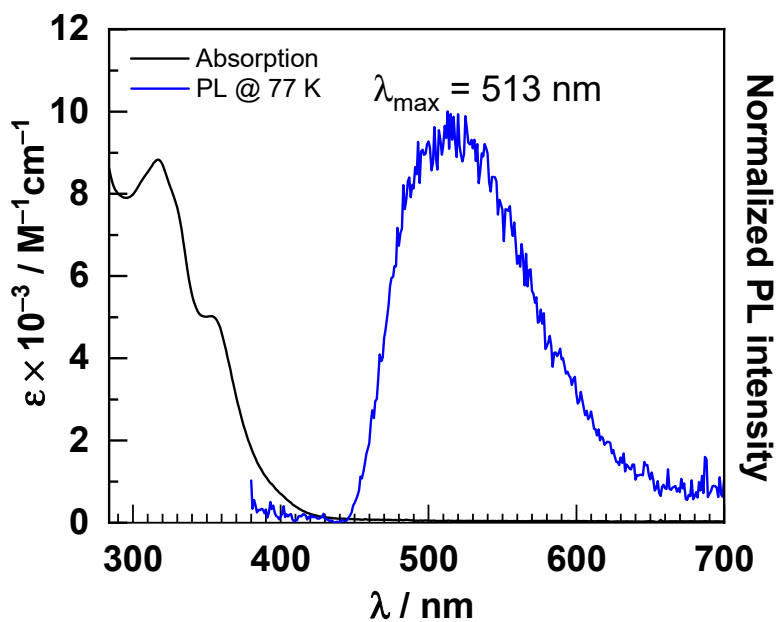

**Fig. S24.** UV-vis absorption (solid black line, 298 K) and photoluminescence (solid blue line, 77 K) spectra of **Cu<sub>4</sub>**, recorded in toluene.

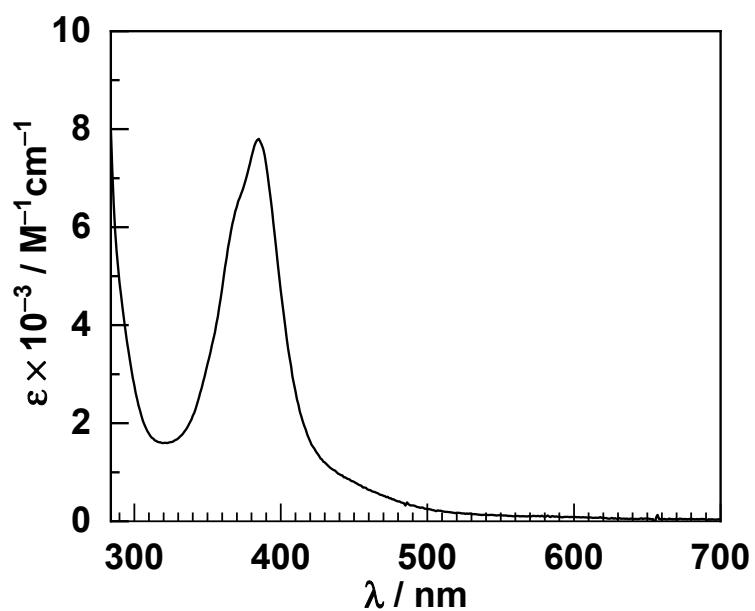

**Fig. S25.** UV-vis absorption spectrum of **Cu5**, recorded at 298 K in toluene.

**Table. S6.** Summary of the UV-vis absorption data of complexes **Cu1–Cu5**.

|                                                                                    | UV-vis absorption,<br>$\lambda / \text{nm}$ ( $\epsilon \times 10^{-3} / \text{M}^{-1} \text{cm}^{-1}$ ) |
|------------------------------------------------------------------------------------|----------------------------------------------------------------------------------------------------------|
| $\text{Cu}(\text{PhNacNac}^{\text{Me}})(\text{PPh}_3)$ ( <b>Cu1</b> )              | 354 (13)                                                                                                 |
| $\text{Cu}(\text{PhNacNac}^{\text{Me}})(\text{PPh}^{\text{F}_3})$ ( <b>Cu2</b> )   | 353 (17)                                                                                                 |
| $\text{Cu}(\text{PhNacNac}^{\text{Me}})(\text{PPh}^{\text{OMe}_3})$ ( <b>Cu3</b> ) | 354 (8.8)                                                                                                |
| $\text{Cu}(\text{CyNacNac}^{\text{Me}})(\text{PPh}_3)$ ( <b>Cu4</b> )              | 317 (8.8), 353 (5.0)                                                                                     |
| $\text{Cu}(\text{PhNacNac}^{\text{CF}_3})(\text{PPh}_3)$ ( <b>Cu5</b> )            | 370 (sh) (6.4), 385 (7.8), 448 (sh) (0.82)                                                               |

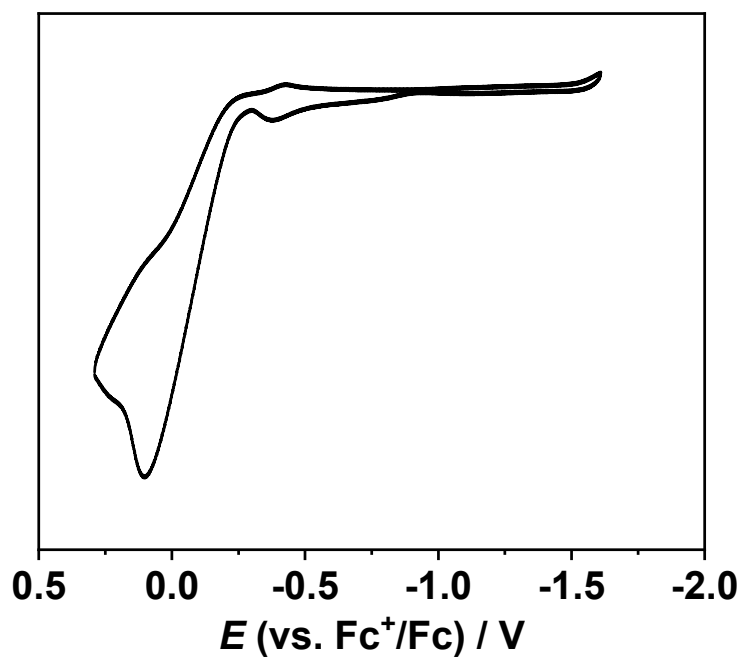

**Fig. S26.** Cyclic voltammogram of **Cu1** recorded in THF with 0.1 M  $\text{NBu}_4\text{PF}_6$  as the supporting electrolyte. The potential was referenced against an internal standard of ferrocene.

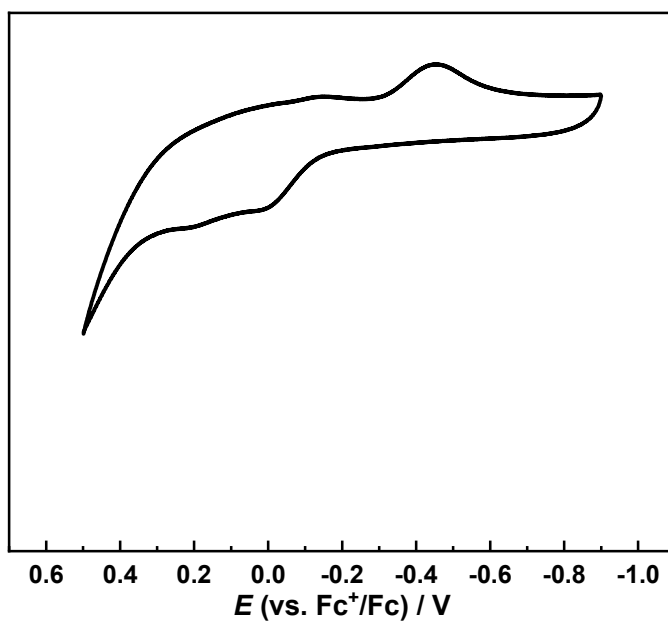

**Fig. S27.** Cyclic voltammogram of **Cu2** recorded in THF with 0.1 M  $\text{NBu}_4\text{PF}_6$  as the supporting electrolyte. The potential was referenced against an internal standard of ferrocene.

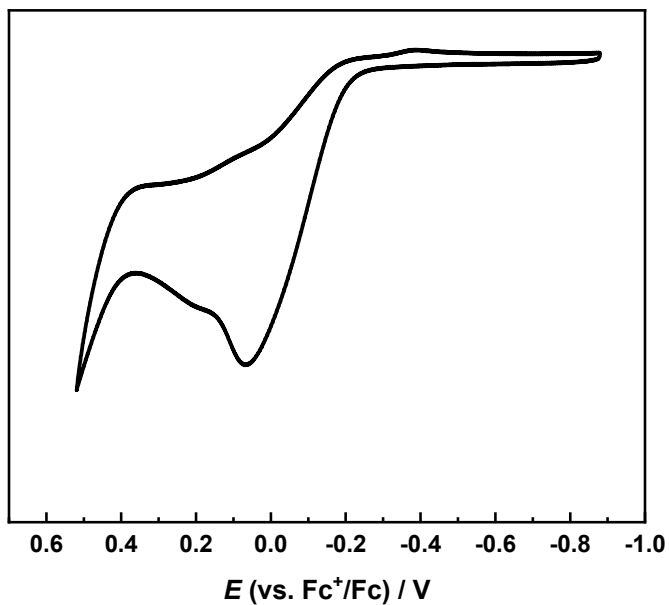

**Fig. S28.** Cyclic voltammogram of **Cu3** recorded in THF with 0.1 M  $\text{NBu}_4\text{PF}_6$  as the supporting electrolyte. The potential was referenced against an internal standard of ferrocene.

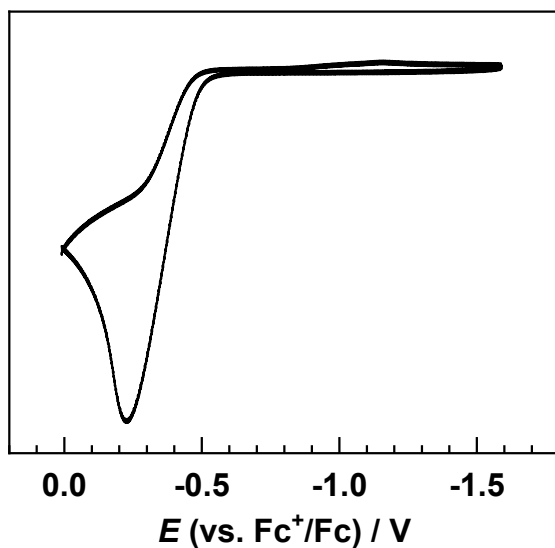

**Fig. S29.** Cyclic voltammogram of **Cu4** recorded in THF with 0.1 M  $\text{NBu}_4\text{PF}_6$  as the supporting electrolyte. The potential was referenced against an internal standard of ferrocene.

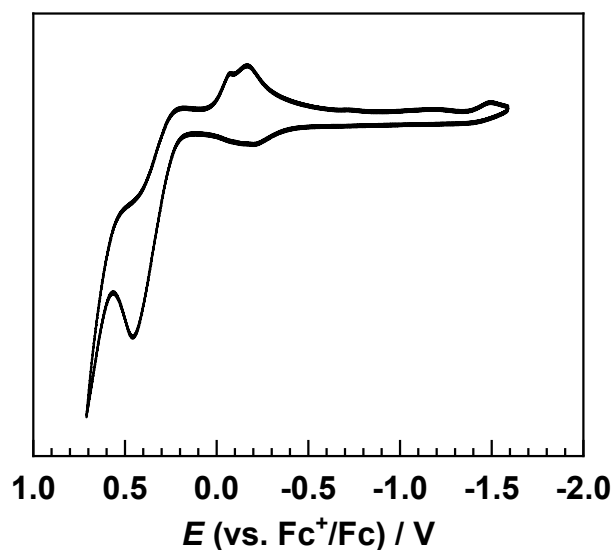

**Fig. S30.** Cyclic voltammogram of **Cu5** recorded in THF with 0.1 M  $\text{NBu}_4\text{PF}_6$  as the supporting electrolyte. The potential was referenced against an internal standard of ferrocene.

**Table S7.** Summary of the electrochemical data of the complexes **Cu1–Cu5**. For all of these compounds, there is no reduction wave observed within the solvent electrochemical window. All observed waves are irreversible and potentials are reported as the peak anodic potential,  $E_{p,a}$ .

|                                                                                    | $E^{\text{ox}} / \text{V}$<br>( $[\text{Cu}]^+ / [\text{Cu}]$ ) |
|------------------------------------------------------------------------------------|-----------------------------------------------------------------|
| $\text{Cu}(\text{PhNacNac}^{\text{Me}})(\text{PPh}_3)$ ( <b>Cu1</b> )              | 0.11                                                            |
| $\text{Cu}(\text{PhNacNac}^{\text{Me}})(\text{PPh}^{\text{F}_3})$ ( <b>Cu2</b> )   | 0.03                                                            |
| $\text{Cu}(\text{PhNacNac}^{\text{Me}})(\text{PPh}^{\text{OMe}_3})$ ( <b>Cu3</b> ) | 0.07                                                            |
| $\text{Cu}(\text{CyNacNac}^{\text{Me}})(\text{PPh}_3)$ ( <b>Cu4</b> )              | -0.22                                                           |
| $\text{Cu}(\text{PhNacNac}^{\text{CF}_3})(\text{PPh}_3)$ ( <b>Cu5</b> )            | 0.46                                                            |

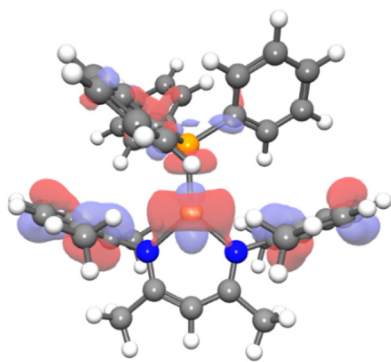

HOMO-3 (-6.18 eV)

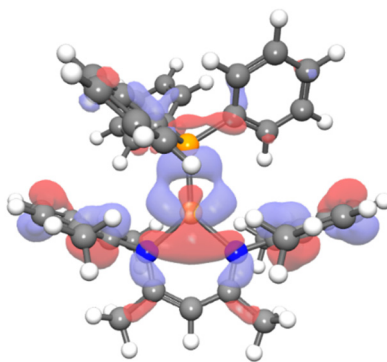

HOMO-2 (-6.04 eV)

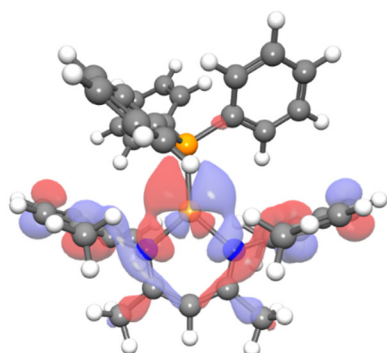

HOMO-1 (-5.11 eV)

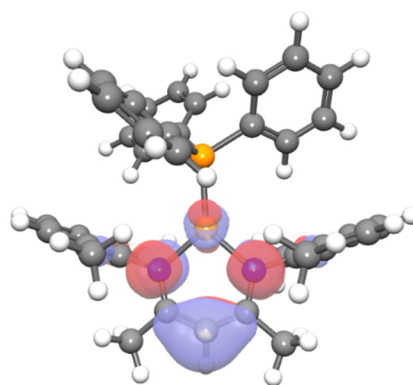

HOMO (-4.87 eV)

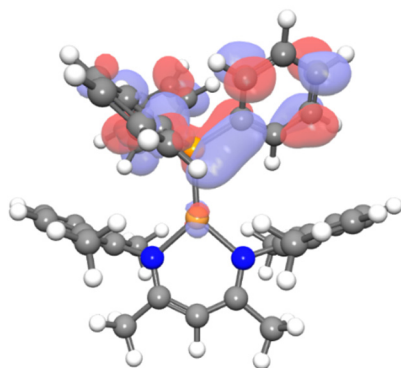

LUMO (-1.12 eV)

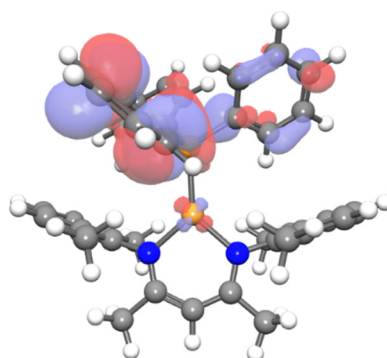

LUMO+1 (-1.06 eV)

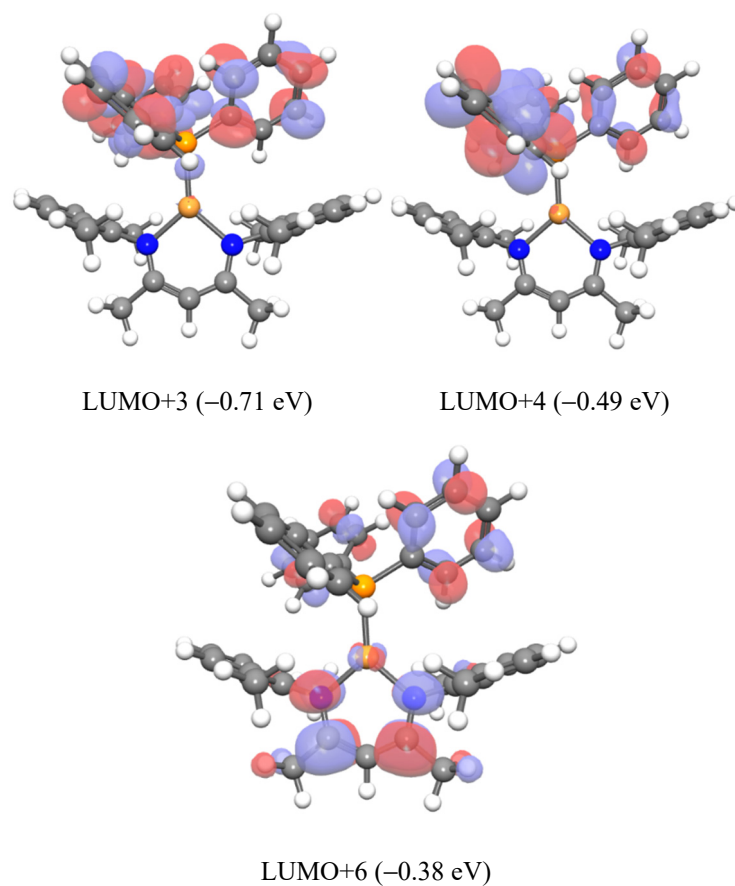

**Fig. S31.** Frontier molecular orbitals (isovalue 0.08) of Cu6 (at the uB3LYP/6-31+g(d) in toluene) associated with the computed UV-vis absorption transitions.

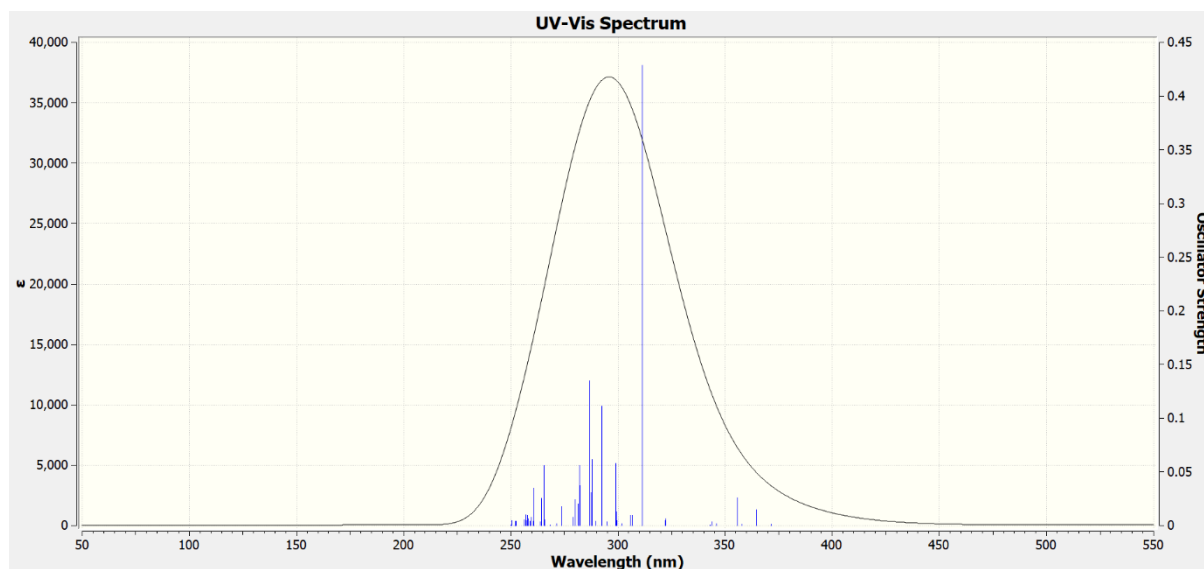

**Fig. S32.** Simulated UV-vis absorption spectrum of complex Cu6 obtained by TDDFT calculation at the level of uB3LYP/6-31+g(d) with CPCM solvent model in toluene.



**Table S8.** Major transition assignments of complex **Cu6**, determined by TDDFT.

| $\lambda$ /nm | Oscillator strength ( <i>f</i> ) | Description                            |
|---------------|----------------------------------|----------------------------------------|
| 311.41        | 0.4290                           | HOMO-1 $\rightarrow$ LUMO+3 (0.18067)  |
|               |                                  | HOMO $\rightarrow$ LUMO+4 (0.63894)    |
| 292.53        | 0.1112                           | HOMO-3 $\rightarrow$ LUMO+1 (0.10588)  |
|               |                                  | HOMO-2 $\rightarrow$ LUMO+1 (0.67564)  |
| 298.91        | 0.0582                           | HOMO-2 $\rightarrow$ LUMO+1 (0.61751)  |
|               |                                  | HOMO-1 $\rightarrow$ LUMO+6 (-0.20356) |
|               |                                  | HOMO $\rightarrow$ LUMO+6 (-0.13131)   |
| 355.75        | 0.0262                           | HOMO-1 $\rightarrow$ LUMO+1 (0.63937)  |
|               |                                  | HOMO $\rightarrow$ LUMO+1 (0.22254)    |
|               |                                  | HOMO $\rightarrow$ LUMO (0.11722)      |
| 364.68        | 0.0147                           | HOMO-1 $\rightarrow$ LUMO+1 (-0.13219) |
|               |                                  | HOMO $\rightarrow$ LUMO (0.68672)      |

**Table S9.** Optimized Cartesian coordinates for **Cu6** in the ground state.

Electronic energy (EE): -58704.626287969 eV

No. of imaginary frequency: 0

|    |        |         |         |
|----|--------|---------|---------|
| Cu | 6.8125 | 9.7106  | 3.5907  |
| P  | 5.5812 | 9.916   | 5.3652  |
| N  | 7.3952 | 10.9257 | 2.1836  |
| N  | 7.5602 | 8.0791  | 2.809   |
| C  | 7.0253 | 12.2966 | 2.2912  |
| C  | 7.9072 | 13.1975 | 2.8996  |
| C  | 7.5026 | 14.5035 | 3.0926  |
| H  | 8.0937 | 15.1218 | 3.5054  |
| C  | 6.2534 | 14.9201 | 2.6941  |
| H  | 5.991  | 15.8233 | 2.8277  |
| C  | 5.3835 | 14.0343 | 2.103   |
| H  | 4.5248 | 14.3341 | 1.8295  |
| C  | 5.7421 | 12.7051 | 1.899   |
| C  | 9.2302 | 12.6982 | 3.4186  |
| H  | 9.7076 | 13.4335 | 3.8563  |
| H  | 9.7664 | 12.3583 | 2.6723  |
| H  | 9.0762 | 11.9779 | 4.0652  |
| C  | 4.7735 | 11.711  | 1.3131  |
| H  | 3.9302 | 12.1629 | 1.1005  |
| H  | 4.6064 | 10.9962 | 1.9622  |
| H  | 5.1537 | 11.3274 | 0.4953  |
| C  | 7.2444 | 6.8398  | 3.4447  |
| C  | 7.9444 | 6.4561  | 4.5869  |
| C  | 7.5655 | 5.2951  | 5.2503  |
| H  | 8.0269 | 5.032   | 6.038   |
| C  | 6.5282 | 4.5211  | 4.777   |
| H  | 6.2872 | 3.7219  | 5.231   |
| C  | 5.8454 | 4.9     | 3.6579  |
| H  | 5.1297 | 4.3582  | 3.3455  |
| C  | 6.1723 | 6.065   | 2.9605  |
| C  | 9.0997 | 7.287   | 5.076   |
| H  | 9.3832 | 6.9652  | 5.9571  |
| H  | 8.8216 | 8.2243  | 5.1445  |
| H  | 9.8456 | 7.2127  | 4.4451  |
| C  | 5.4066 | 6.4869  | 1.7442  |
| H  | 5.9468 | 6.3197  | 0.9437  |
| H  | 5.1989 | 7.4428  | 1.8042  |
| H  | 4.5732 | 5.9743  | 1.6887  |
| C  | 8.1428 | 10.5445 | 1.158   |
| C  | 8.6225 | 9.2417  | 0.9891  |
| H  | 9.2205 | 9.1203  | 0.261   |
| C  | 8.3485 | 8.0882  | 1.7393  |
| C  | 8.49   | 11.5416 | 0.0685  |
| H  | 7.6674 | 11.8457 | -0.3698 |
| H  | 9.0731 | 11.1138 | -0.5923 |
| H  | 8.9521 | 12.3099 | 0.4641  |
| C  | 8.9934 | 6.7995  | 1.2587  |
| H  | 9.373  | 6.3191  | 2.024   |

|   |        |         |        |
|---|--------|---------|--------|
| H | 9.7058 | 7.0096  | 0.6191 |
| H | 8.3182 | 6.2389  | 0.8231 |
| C | 5.5931 | 11.4778 | 6.3197 |
| C | 5.9427 | 12.6518 | 5.6722 |
| H | 6.1882 | 12.629  | 4.7546 |
| C | 5.9372 | 13.861  | 6.3537 |
| H | 6.1873 | 14.6582 | 5.9015 |
| C | 5.5729 | 13.9137 | 7.6763 |
| H | 5.5616 | 14.7451 | 8.1358 |
| C | 5.2226 | 12.7503 | 8.3357 |
| H | 4.9765 | 12.7821 | 9.2528 |
| C | 5.2289 | 11.541  | 7.6667 |
| H | 4.9835 | 10.7468 | 8.1265 |
| C | 3.8378 | 9.7485  | 4.8502 |
| C | 2.8769 | 10.7279 | 5.0953 |
| H | 3.0978 | 11.4851 | 5.6247 |
| C | 1.5997 | 10.6017 | 4.5697 |
| H | 0.9544 | 11.2795 | 4.7352 |
| C | 1.2558 | 9.5071  | 3.8119 |
| H | 0.3804 | 9.4315  | 3.4501 |
| C | 2.1932 | 8.5173  | 3.5801 |
| H | 1.9566 | 7.7513  | 3.0702 |
| C | 3.4741 | 8.6391  | 4.0889 |
| H | 4.1138 | 7.958   | 3.9171 |
| C | 5.7972 | 8.69    | 6.7125 |
| C | 7.0205 | 8.6699  | 7.3721 |
| H | 7.7163 | 9.2538  | 7.0936 |
| C | 7.2319 | 7.8045  | 8.432  |
| H | 8.0705 | 7.7993  | 8.8785 |
| C | 6.2314 | 6.9513  | 8.8416 |
| H | 6.3749 | 6.3616  | 9.5723 |
| C | 5.0333 | 6.9592  | 8.1907 |
| H | 4.3458 | 6.3669  | 8.471  |
| C | 4.8026 | 7.8195  | 7.124  |
| H | 3.9635 | 7.8102  | 6.6781 |
